# Quantitative coupling of cell volume and membrane tension during osmotic shocks

Chloé Roffay<sup>1</sup>, Guillaume Molinard<sup>1</sup>, Kyoohyun Kim<sup>2</sup>, Victoria Barbarassa<sup>1</sup>, Marta Urbanska<sup>2</sup>, Vincent Mercier<sup>1</sup>, José García-Calvo<sup>3</sup>, Stefan Matile<sup>3,4</sup>, Jochen Guck<sup>2</sup>, Martin Lenz<sup>5</sup>, and Aurélien Roux<sup>1,3,\*</sup>

<sup>1</sup>Department of Biochemistry, University of Geneva, CH-1211 Geneva, Switzerland

<sup>2</sup>Max Planck Institute for the Science of Light & Max-Planck-Zentrum für Physik und Medizin, Staudtstraße 2, DE-91058 Erlangen, Germany

<sup>3</sup>School of Chemistry and Biochemistry, University of Geneva, CH-1211 Geneva, Switzerland

<sup>4</sup>National Centre of Competence in Research (NCCR) Chemical Biology, University of Geneva, CH-1211 Geneva, Switzerland

<sup>5</sup>Université Paris-Saclay, CNRS, LPTMS, 91405, Orsay, France; PMMH, CNRS, ESPCI Paris, PSL University, Sorbonne Université, Université de Paris, F-75005, Paris, France

\*correspondence to : aurelien.roux@unige.ch

## ABSTRACT

During osmotic changes of their environment, cells actively regulate their volume and plasma membrane tension that can passively change through osmosis. How tension and volume are coupled during osmotic adaptation remains unknown, as a quantitative characterization is lacking. Here, we performed dynamic membrane tension and cell volume measurements during osmotic shocks. During the first few seconds following the shock, cell volume varied to equilibrate osmotic pressures inside and outside the cell, and membrane tension dynamically followed these changes. A theoretical model based on the passive, reversible unfolding of the membrane as it detaches from the actin cortex during volume increase, quantitatively describes our data. After the initial response, tension and volume recovered from hypoosmotic shocks but not from hyperosmotic shocks. During these asymmetric recoveries, tension and volume remained coupled. Pharmacological disruption of the cytoskeleton and functional inhibition of ion channels and mTOR all affected tension and volume responses, proving that a passive mechanism is necessary and critical for the cell to adapt fast. The coupling between them was, nonetheless, maintained for a few exceptions suggesting that volume and tension regulations are independent from the regulation of their coupling.

## 1 Introduction

2 Lipid membranes are self-assembled viscoelastic bilayers separating cells and their organelles from their  
3 environment. They are easy to bend but resistant to stretching: their lysis tension - the tension at which they  
4 break - is high, in the range of a few mN/m<sup>1,2</sup>. This high value protects cells against lysis upon processes  
5 that stretch the cell membrane. Plasma membrane tension arises from the combined contributions of  
6 osmotic pressure, in-plane tension and cytoskeletal forces<sup>3,4</sup>. The cytoskeleton is intimately linked to all  
7 processes regulating membrane tension, in particular cell volume regulation<sup>5</sup>. For example, hypotonic  
8 shocks are not only responsible for increasing membrane tension but also induce the degradation of  
9 vimentin<sup>6</sup> and a reorganization of actin filaments<sup>7,8</sup>, without affecting microtubules<sup>6</sup>. It has been proposed

10 that the cytoskeleton regulates membrane tension by setting its value through active force generation, and  
11 by establishing a membrane reservoir that buffers acute changes in tension<sup>9</sup>. This membrane reservoir is  
12 stored around protruding actin-based structures such as ruffles, filopodia and microvilli<sup>10</sup>. Cell volume  
13 regulation during osmotic changes involves mechano-sensitive ion channels<sup>2,11</sup> regulated by membrane  
14 tension<sup>12,13</sup>. How ion channel activity is coupled to the cytoskeleton is under debate<sup>14</sup>. The channels  
15 comprise volume-regulated anion channels (VRACs), sodium-hydrogen antiporters (NHEs) and Na-K-Cl  
16 cotransporters (NKCC1). VRACs are activated by hypotonic stress<sup>15,16</sup> and are unique in transporting  
17 small organic osmolytes – in particular taurine - in addition to anions<sup>17,18</sup>. NHEs inhibition prevents  
18 regulatory volume increases of cells<sup>19,20</sup>. Cells have evolved to respond to changes in membrane tension  
19 so as to control their impact on many processes essential to cell life<sup>21</sup>. The genetic response to an  
20 osmotic stress has been studied extensively. This pathway partly consists of activating genes involved  
21 in the synthesis or degradation of osmo-protectant molecules (such as glycerol in yeast, and amino  
22 acids in mammalian cells), and their subsequent secretion<sup>19,22–26</sup>. However, the genetic response minute  
23 timescale cannot account for the cell's immediate resistance to stretch<sup>19,23</sup>. The master regulator of  
24 plasma membrane tension is probably Target of Rapamycin Complex 2 (TORC2)<sup>27</sup> and its mammalian  
25 homologous mTORC2. Indeed, TORC2 signaling increases instantaneously upon membrane tension  
26 increase<sup>28</sup> as well as mTORC2 activity<sup>29</sup>, and decreases upon tension loss<sup>26</sup>. TORC2 regulates endocytosis  
27 through membrane tension<sup>30</sup>, but also actin polymerization<sup>31</sup>. Despite its undeniable importance, the  
28 mechanisms driving the regulation of membrane tension during osmotic shocks in relation to cell volume  
29 changes are still not understood. Qualitatively, membrane tension has been reported to decrease in response  
30 to hypertonic shocks<sup>32,33</sup>, while studies have reported that it either stays constant<sup>33,34</sup> or increases<sup>32,35,36</sup>  
31 upon hypotonic shock. The relation between osmolarity and cell volume change is captured by the  
32 Ponder/Boyle/Vant'Hoff (PBVH) relation whereby the cell shrinks until the osmotic pressure of its  
33 contents matches that of the extracellular medium<sup>37</sup>. This relation involves an osmotically inactive volume  
34 (OIV) which represents the minimum volume occupied by tightly packed cellular constituents at very high  
35 hypertonicity<sup>38,39</sup>. In addition, while the PBVH relation describes the changes in cell volume in response  
36 to an osmotic shock, the response of the membrane tension to such shocks has never been quantitatively  
37 studied. In this study, we elucidate quantitatively the coupling between cell volume and membrane tension  
38 in single cells during osmotic shocks using time-resolved techniques.

## 39 Results

40 We exposed HeLa Kyoto cells to step-wise osmotic shocks (Fig 1a, see Methods). A few seconds after  
41 a hypotonic shock with 75% water, cell volume peaked at approx. 2.4 times the initial volume. The  
42 volume subsequently recovered, but only partially, leaving a 15% volume increase after 10 min (Fig 1b).  
43 Weaker dilutions (50% and 25%) led to lower peaks and faster recovery (Fig 1b). Conversely, hypertonic  
44 shocks led to a rapid volume decrease within seconds, followed by a 10 min plateau. In the most extreme  
45 hypertonic conditions (3500 mOsm), cell volume decreased by up to 90% (Supp Fig 1a-b). Before the

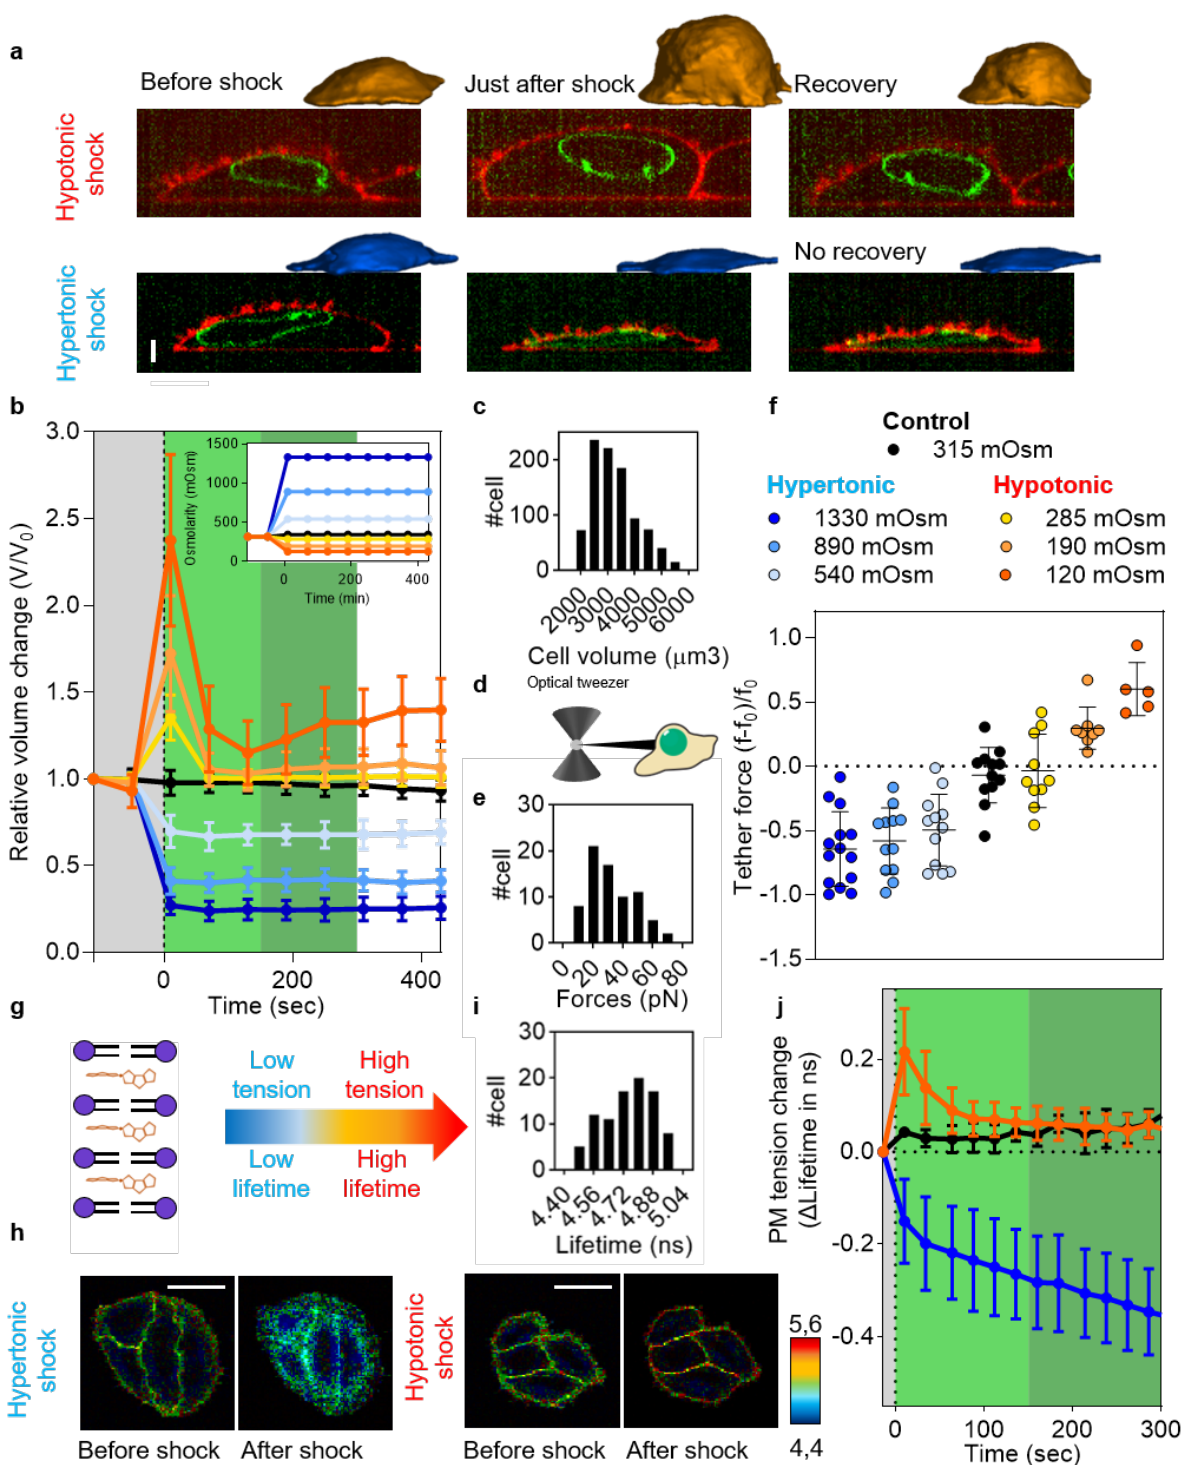

**Figure 1. Osmotic shocks affect cell volume and membrane tension.** **a**, 3D reconstruction of cell volume using Limeseg (top hypo, bottom hyper). **b**, Averaged cell volume dynamics under osmotic shock (grey : before shocks; light green : short-term response; dark green : long-term response). Insert : osmolarities (mOsm) of cell media with time for the different shocks. **c**, Cell volume distribution in isotonic medium before osmotic shocks. **d**, Tether forces pulled out from cells can be measured with optical tweezers. **e**, Tether force distribution in isotonic medium before osmotic shocks. **f**, Relative change of tether force immediately after osmotic shocks (averaged over 10 sec) for different osmotic shocks. **g**, Fluorescence lifetime of the Flipper-TR probe reports membrane tension changes. **h**, FLIM images of Flipper-TR lifetime values (colorscale) of cells subjected to osmotic shocks. **i**, Distribution of the cell average Flipper-TR lifetimes in isotonic medium before osmotic shocks. **j**, Dynamics of the change of tension as measured by Flipper-TR lifetime (grey : before shock; light green : short-term response; dark green : long-term response).

46 osmotic shocks, cell volume distributions were broad (Fig 1c, Supp Fig 1c-d) while relative cell volume  
47 changes were highly reproducible and essentially due to cytoplasmic volume changes (Supp Fig 1e-g). To  
48 assess the robustness of the recovery dynamics, we performed cell volume measurements using a different  
49 cell type (HL-60/S4) using real-time deformability cytometry (RT-DC) – a high-throughput technique  
50 allowing for rapid characterization of thousands of cells<sup>40</sup> (Supp Fig 2a). After applying the osmotic  
51 shocks to HL-60/S4 cells before loading them into RT-DC, we confirmed our previous observation: cell  
52 volume in a hypotonic medium peaked and recovered while cell volume in a hypertonic medium abruptly  
53 and stably decreased (Supp Fig 2b-c). Our results show that the volume changes associated with osmotic  
54 shocks are rapid, and show a recovery for hypotonic shocks which is absent for hypertonic shocks and  
55 further demonstrate that cell volume can recover from hypotonic, but not hypertonic, shocks.

56  
57 We measured the dynamical changes of membrane tension after osmotic shocks. When membrane  
58 tubes are pulled from the cell membrane using beads held with optical tweezers (Fig 1d), the force required  
59 to hold the tube is a direct measurement of the membrane tension<sup>41</sup>. The distribution of tube forces  
60 before osmotic shock  $f_0$  is broad:  $27 \pm 18$  pN (Fig 1e). As seen for volume variations, changes in the  
61 tube force upon osmotic shocks were almost instantaneous (Supp Fig 2d). Interestingly, changes of the  
62 tube force  $(f - f_0)/f_0$  averaged over 10 seconds immediately following the shock were proportional to  
63 the intensity of the shocks (Fig 1f, Supp Fig 2e-f). To follow the dynamics of tension in real-time, we  
64 used the molecular probe Flipper-TR (fluorescent lipid tension reporter, or FliptR<sup>®</sup>) that reports changes  
65 of membrane tension through changes of its fluorescence lifetime (Fig 1g-h)<sup>26,30,33,42-46</sup>. Consistently  
66 with tube pulling experiments, the lifetime distribution of Flipper-TR in cells membrane before shock  
67 was broad:  $4,76 \pm 0,15$  ns (Fig 1i), and the lifetime changed within seconds after shock (Fig 1h-1j). We  
68 observed an asymmetry in lifetime measurement during recovery phase similar to the one observed for  
69 volume measurements: membrane tension peaked and recovered within seconds after hypotonic shock  
70 while it decreased within seconds after hypertonic shock, and continued decreasing for the duration of the  
71 experiment, although at a lower rate (Fig 1j). Our results show that membrane tension variations after  
72 osmotic shocks qualitatively follow cell volume changes.

73

To quantitatively capture the relationship between the osmotic pressure of the cell and its volume (Fig  
2a, Supp Fig 3a-c), we used the PBVH equation of state<sup>37,39,47</sup>

$$P(V - V_{OI}) = P_0(V_0 - V_{OI}), \quad (1)$$

74 where  $P$  is the osmotic pressure of the intracellular medium,  $V$  the cell volume and  $P_0$  and  $V_0$  are values  
75 of  $P$  and  $V$  under isotonic conditions. Equation (1) assimilates the contents of the cell to a solution of  
76 particles with steric repulsions and otherwise negligible interactions, with the sum of the particles excluded  
77 volumes equal to  $V_{OI}$ . The cell volume thus cannot be compressed below the 'osmotically inactive volume'

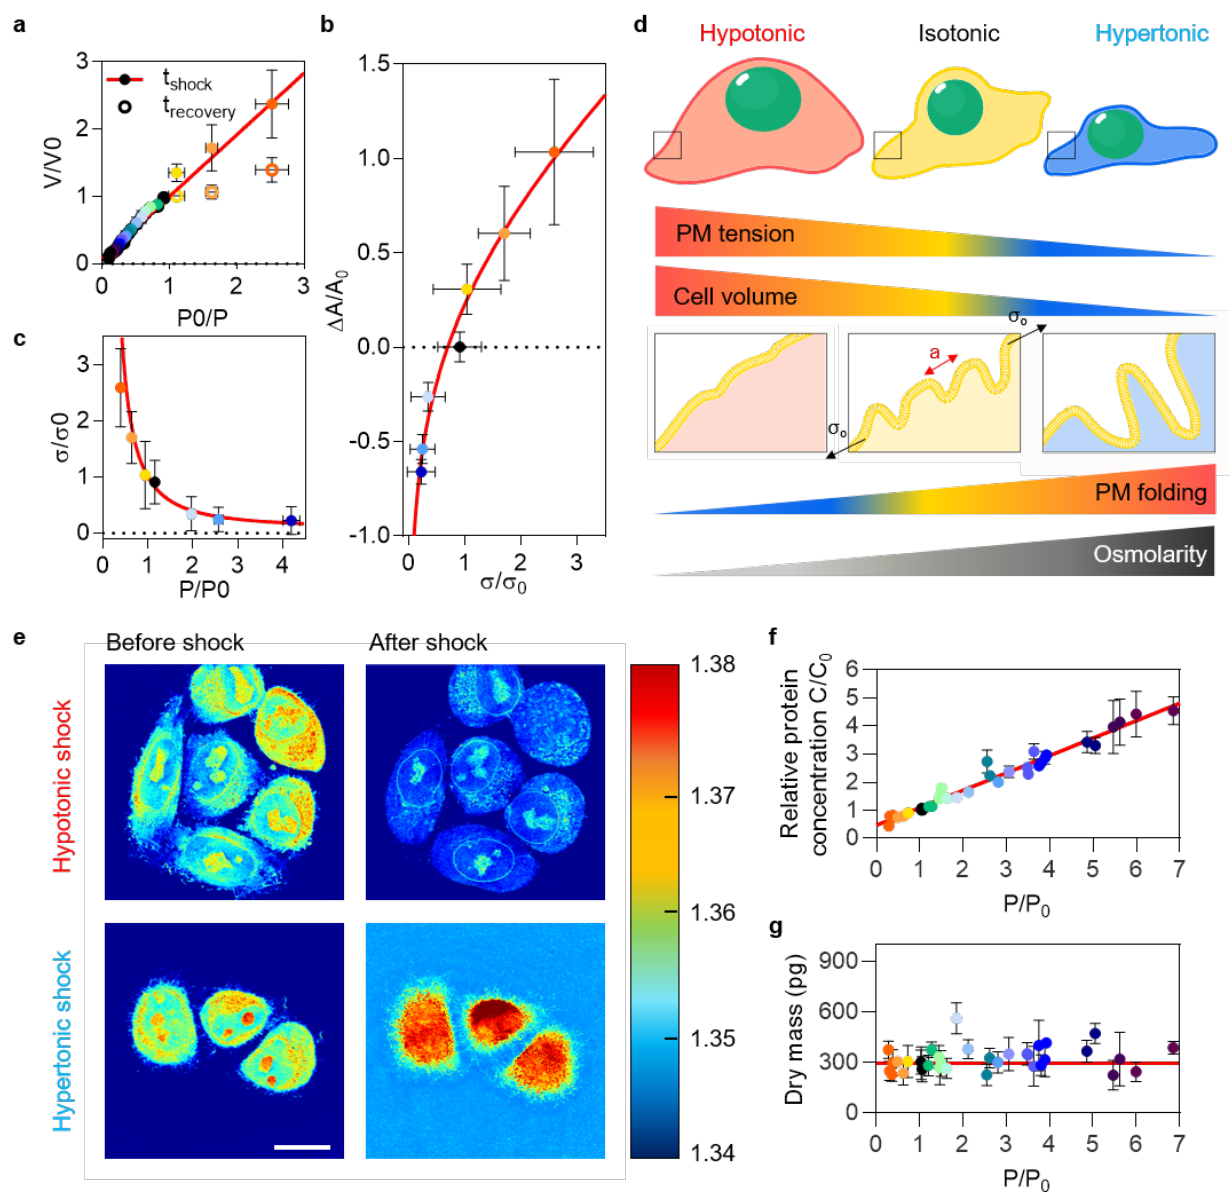

**Figure 2. Quantitative coupling of cell membrane tension to osmotic shocks.** **a**, Scheme describing the theory. **b**, Normalized volume changes ( $V/V_0$ ) as a function of osmotic pressure ratio ( $P_0/P$ ) just after osmotic shocks (full circle) and 8 min after the osmotic shock (empty circle, recovery phase) compared to the prediction of Eq. (1) (red line). **c**, Relative changes of membrane area ( $\Delta A/A_0$ ) versus relative changes of membrane tension ( $\Delta\sigma/\sigma_0$ ) compared to the prediction of Eq. (2) (red line). **d**, Normalized tension ( $\sigma/\sigma_0$ ) versus normalized pressure ( $P/P_0$ ) and prediction obtained by combining Eq. (1) and Eq. (2). **e**, Refractive index images of cells under osmotic shocks. **f**, Protein concentration changes ( $C/C_0$ ) according to pressure applied ( $P/P_0$ ). **g**, Calculated dry mass of cells versus normalized pressure ( $P/P_0$ )

78  $V_{OI}$ . Equation (1) is in excellent agreement with both our hypertonic and hypotonic data (Fig 2a), when  
79 the volume is estimated at the time of hypotonic peak (10s after the shock, shown in Fig 1b, Supp Fig 1b).  
80 A single-parameter fit yields  $V_{OI} = 300 \mu m^3$  equal to about 10% of the initial cell volume, smaller than  
81 previous estimates<sup>48</sup>. Interestingly, during and after the recovery phase ( $t > 10s$  after shock) volume values  
82 diverge from this linear relation only in the hypotonic conditions, reflecting the asymmetry of recovery  
83 (Fig 2a). This explains why previous volume measurements after hypotonic shocks were not in agreement  
84 with the PBVH relation, probably because they were performed too late after the shock, at a time when  
85 cells had already recovered.

86  
87 As the volume of the cell changes, so does the tension and area of its membrane (Fig 1f-1j, Supp  
88 Fig 2d-f). To compute the relation between these quantities, we reasoned that the cell membrane is not a  
89 perfectly flat, but is instead heterogeneously folded because of protrusions and buds induced by proteins  
90 and cytoskeletal structures. The ruffled structure of the membrane would thus provide a large area buffer<sup>9</sup>.  
91 Increases in membrane tension unfold these ruffles, releasing more membrane area and allowing the cell  
92 to expand. To quantitatively model this effect (see theoretical supplement), we described the membrane  
93 energy by a modified Helfrich-Hamiltonian where the spontaneous curvature is randomly distributed  
94 according to a Gaussian distribution with exponential correlations. Its statistical properties were described  
95 by two parameters: the typical lateral ruffle size  $a$  (the correlation length of the noise), and the typical  
96 magnitude of mean curvature  $C$  (its strength). Under these assumptions, the relative change of membrane  
97 area during the shock is given by

$$\frac{\Delta A}{A_0}(\sigma) = \sqrt{\frac{g(\sigma_0 a^2 / \kappa)}{g(\sigma a^2 / \kappa)}} - 1 \quad (2)$$

98 where  $\sigma_0$  and  $\sigma$  respectively denote the tension of the membrane in the initial isotonic state and in the  
99 final state,  $\kappa$  is its bending rigidity and the function  $g$  is given by

$$g(\Sigma) = \frac{\Sigma + 2}{4(\Sigma - 1)^{5/2}} \arccos(\Sigma^{-1}) - \frac{3}{4(\Sigma - 1)^2}. \quad (3)$$

100 We find that Eq. (2) agrees very well with our experimental measurements (Fig 2b). The fit gives  
101  $\sigma_0 = 1.2 \times 10^{-4} \text{ N} \cdot \text{m}^{-1}$  and a ruffle size  $a = 37 \text{ nm}$ , which are in good agreement with typical cell  
102 membrane tensions<sup>49</sup> and the size of the smallest membrane invaginations such as caveolae and endocytic  
103 buds<sup>50</sup>. Finally, combining Eqs. (1), (2) and (3) yields a prediction for the dependence of the membrane  
104 tension on osmotic pressure, which is in good agreement with our data (Fig 2c). These results strongly  
105 support the notion that the short-term response of cell volume and membrane tension are predominantly  
106 mechanical and thermodynamic, and consists in a passive equalization of the inner and outer osmotic

107 pressures accompanied by an unfolding of membrane ruffles (Fig 2d).

108

109 Our verification of the PBVH relation yields two surprising results: first, we find that it holds for  
110 a very large range of osmotic pressures in HeLa cells, larger than previously tested. Second, the  $V_{OI}$   
111 represents a smaller proportion of  $V_0$  (only 10%, as compared to values between 7% and 50% in other  
112 studies). To better understand these results, we used optical diffraction tomography, a 3D tomographic  
113 label-free technique, to measure the cells refractive index (RI)<sup>51,52</sup> hence giving a direct access to changes  
114 of mass and concentration in cells subjected to osmotic shocks (Fig 2e). Cells in isotonic conditions had  
115 an average RI =  $1.37 \pm 0.01$ . A few seconds after 1M sucrose shock, cells had an increase in RI to  $1.42 \pm$   
116  $0.01$ , while under 75% water shock conditions the RI decreased to  $1.35 \pm 0.01$ . RI increases linearly with  
117 increasing protein concentration<sup>53</sup>. In our experiment, the RI of single cells changed proportionally to the  
118 applied osmotic pressure (Supp Fig 3d). This implies that the protein concentration changes proportionally  
119 to the osmotic pressure (Fig 2f), which is fully consistent with our finding that cell volume changes  
120 proportionally to the osmotic pressure (Fig 2a). Extracting the concentration from the RI and knowing  
121 the average cell volumes allows for calculation of the dry mass for each osmotic condition (Fig 2g). The  
122 average dry mass of single HeLa cells was  $305 \pm 98$  pg (Supp Fig 3e) and, as expected, is constant  
123 throughout all osmotic shocks (Fig 2g). To directly measure changes of concentration for a single protein  
124 within the cytoplasm, we measured the relative change of fluorescence intensity of cells overexpressing  
125 cytosolic GFP over time. It also varied proportionally to the osmotic pressure (Supplementary information,  
126 Supp Fig 3f-h). Thus, no significant amounts of intracellular solutes were exchanged with the environment,  
127 in agreement with previous studies<sup>30,35</sup>. Our measurement of the dry mass (Fig 2g) also enabled an  
128 estimation of the  $V_{OI}$ . Multiplying the specific volume of dried proteins ( $0.73 \text{ ml/g}$ <sup>54</sup>) by the dry mass, we  
129 found  $V_{OI} = 223.34 \pm 71.88 \mu\text{m}^3$  in agreement with our PBVH fit.

130

131 To understand the origin of the rapid recovery after the hypotonic shock, we studied the contributions  
132 of various cellular processes involved in the osmotic response, starting with the cytoskeleton. We first  
133 imaged the dynamics of the actin cortex during osmotic shocks using SiR-Actin. Upon hypotonic shock,  
134 we observed cell blebbing concomitant with cortical actin depolymerization (Fig 3a). Blebs then extended  
135 and merged into a large membrane dome (Fig 3a side view). By quantifying cortical actin fluorescence, we  
136 observed a complete repolymerization of the cortex four minutes after the shock (Fig 3b), to a value higher  
137 than the initial value. Following a hypertonic shock, the actin cytoskeleton appeared more condensed,  
138 and its fluorescence intensity gradually increased with time (Fig 3b). We also addressed the behavior of  
139 microtubules using SiR-Tubulin. After hypotonic shocks, microtubules also depolymerized and appeared  
140 more condensed after a hypertonic shock, but to a smaller extent than actin (Fig 3c-d). These results  
141 suggest that actin dynamics is strongly disturbed shortly after osmotic shocks but counteracts high pressure  
142 differences by polymerizing over longer times.

143

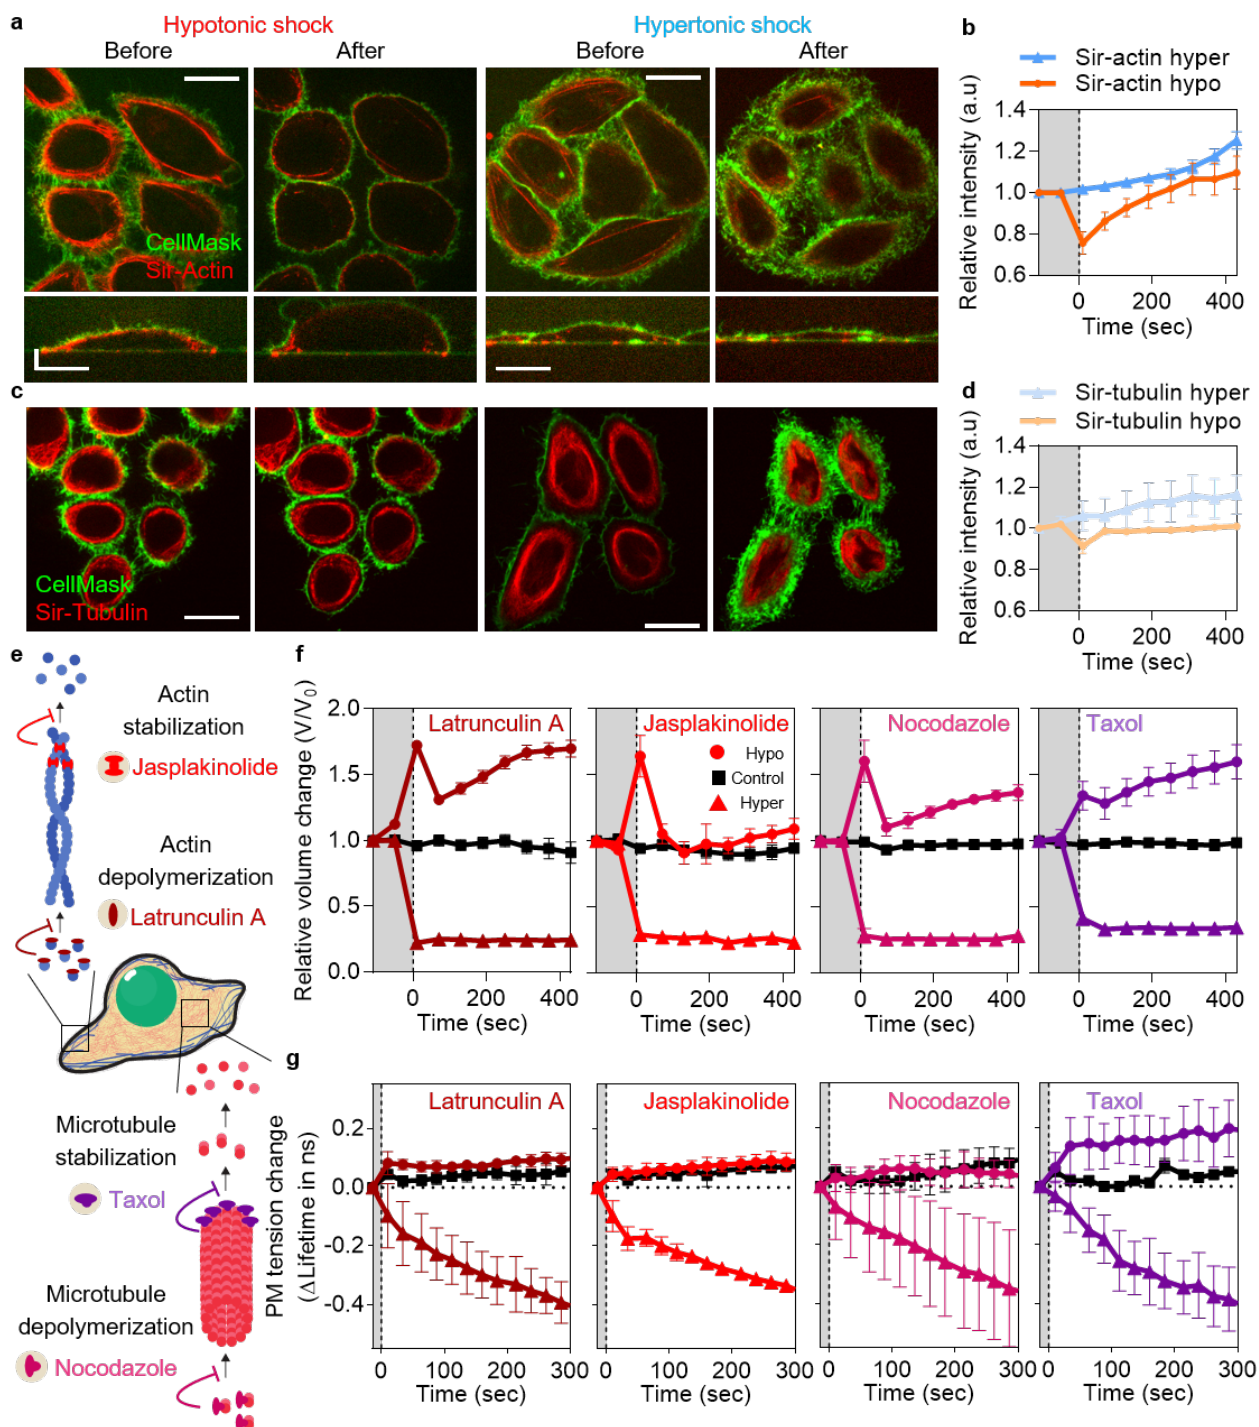

**Figure 3. Cytoskeleton controls the long-term response of cells to osmotic shocks.** **a**, Actin imaging under hypotonic shock (left) and hypertonic shock (right). Scale bar : 20  $\mu\text{m}$ . Bottom panels are y projections. **b**, Quantification of actin fluorescence intensities during shocks. **c**, Tubulin imaging under hypotonic shock (left) and hypertonic shock (right). Scale bar : 20  $\mu\text{m}$ . **d**, Quantification of tubulin fluorescence intensities during shocks. **e**, Illustrations of cytoskeletal drugs effects. **f**, Single cell volume dynamics of cells treated with latrunculin A, jasplakinolide, nocodazole or taxol during hypotonic shocks (90 mOsm - 75% water, circle), isotonic condition (315 mOsm, square) and hypertonic shocks (700 mOsm - P/P0 = 2, triangle). **g**, Membrane tension dynamics of cells treated with latrunculin A, jasplakinolide, nocodazole or taxol during the same shocks as in e.



144 To test this hypothesis, we used latrunculin A to depolymerize the F-actin or jasplakinolide to stabilize  
145 it (Fig 3e). We then followed the cell volume and tension changes with time and compared them to  
146 untreated cells. As described below, none of the drugs used affected the response to hypertonic shocks (Fig  
147 3f, Supp Fig 4a-b), consistent with the hypertonic response being essentially passive. Similarly, both drugs  
148 had little effect on the initial peak in cell volume after hypotonic shock, consistent with the short-term  
149 response to hypotonicity being passive. However, latrunculin radically modified the later-time recovery  
150 compared to non-treated and jasplakinolide-treated cells. Indeed, the volume of latrunculin-treated cells  
151 partially recovered after the initial peak, but then diverged a few minutes after shock (Fig 3g). By contrast,  
152 the volume of jasplakinolide treated cells evolved similarly to that of non-treated cells (Fig 3f), although  
153 over a shorter time scale. Interestingly, the tension dynamics of both latrunculin and jasplakinolide-treated  
154 cells were completely decoupled from volume dynamics, as no peak, and thus no recovery, was observed  
155 (Fig 3g). Thus, the actin cortex is a major component of the coupling between membrane tension and  
156 volume dynamics (Fig 3g).

157

158 Depolymerization of microtubules with nocodazole had limited effects on the volume dynamics after  
159 hypotonic shocks but also decoupled tension from volume changes, as no tension changes were observed  
160 (Fig 3f, Supp Fig 4b). Conversely, stabilizing microtubules with taxol clearly affected the dynamics of  
161 volume changes, as its peak was significantly smaller than in non-treated cells, and no recovery was  
162 observed. In taxol-treated cells, tension dynamics closely followed cell volume dynamics even though  
163 they were different from non-treated cells (Fig 3g). These results show that tension dynamics can be  
164 decoupled from volume dynamics when actin turnover is affected. As seen for taxol-treated cells, it is  
165 possible to qualitatively change the volume and tension response to osmotic shock, while preserving their  
166 coupling. Finally, none of the treatments affected the hypertonic response, suggesting that cells respond  
167 passively to this condition, or at least without the involvement of the cytoskeleton.

168

169 Ion channels are a central regulators of cell volume, and are thus involved in the cell response to  
170 osmotic shocks. We used pharmacological inhibitors of the three classes of channels involved in osmotic  
171 stress response: DCPIB inhibits VRACs, while EIPA inhibits NHE channels and Bumetanide inhibits  
172 NKCC1 channels (Fig 4a). In all hypertonic conditions, none of the inhibitors tested significantly affected  
173 the cell volume and tension responses, again indicating that the hypertonic response is essentially passive  
174 (Supp Fig 4c). However, after hypotonic shocks, we observed a gradual impact of drugs from Bumetanide  
175 to DCPIB on the short-term cell swelling. DCPIB-treated cells were instantaneously permeabilized upon  
176 strong hypotonic shock, as seen by the instantaneous labelling of intracellular membranes with CellMask  
177 (75% water/90mOsm, Fig 4b). Cell volume did not change in milder hypotonic conditions (25% and  
178 50% water, Fig 4c). By contrast, cells treated with Bumetanide had a smaller but significant peak in cell  
179 volume (Fig 4c), and EIPA-treated cells showed no peak immediately after hypotonic shock (Fig 4c). In  
180 EIPA- and Bumetanide-treated cells, cell volume slowly diverged three minutes after shock (Fig 4c),

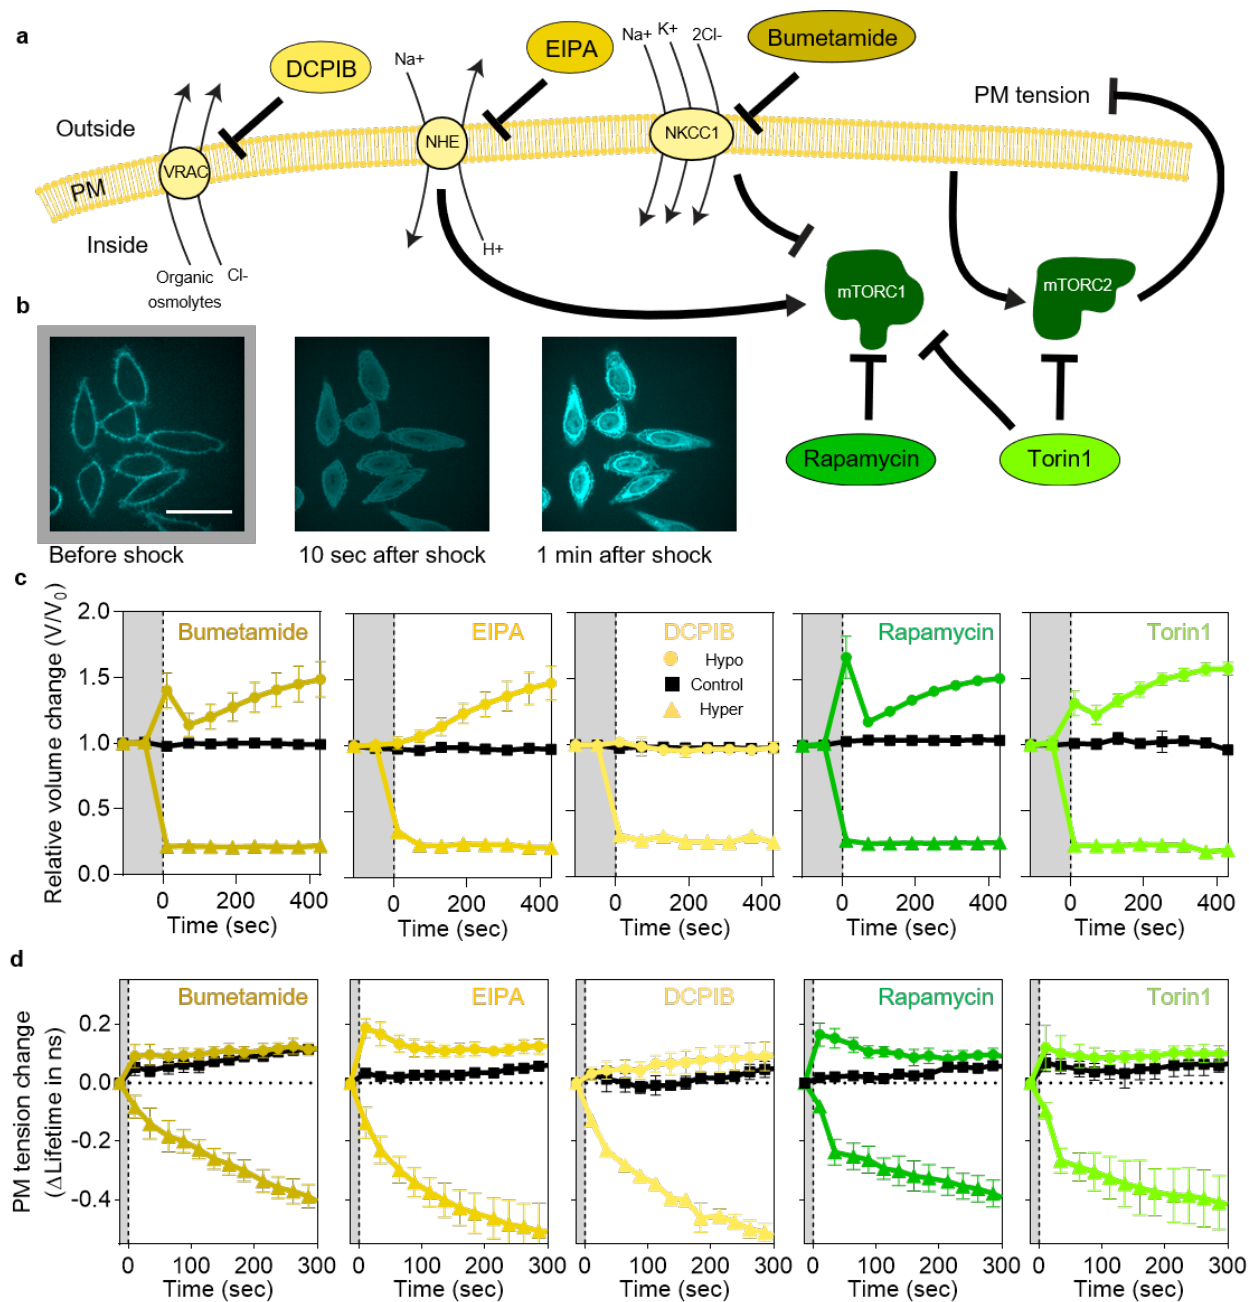

**Figure 4. Ion channels are responsible for the short-term response of cells to osmotic shocks** **a**, Illustrations of DCPIB, EIPA and Bumetamide pharmacological effects on, respectively, VRACs, NHE and NKCC1 channels. Signaling pathways from channels to mTOR complexes inhibited by Torin 1 (mTORC1 and mTORC2) or rapamycin (mTORC1) are represented. **b**, Confocal images of DCPIB treated cells and response under hypotonic shock. Scale bar = 40 $\mu$ m. **c**, Single cell volume dynamics in cells treated with Bumetamide, EIPA, DCPIB, rapamycin or Torin1 for hypotonic shocks (90 mOsm - 75% water, circle), isotonic condition (315 mOsm, square) and hypertonic shocks (700 mOsm - P/P0 = 2, triangle). **d**, Membrane tension dynamics in cells treated with Bumetamide, EIPA, DCPIB, rapamycin or Torin1 for identical shocks as in c.

181 while DCPIB-treated cells showed no volume change (Fig 4c). For all three drugs, the tension dynamics  
182 during hypotonic shock was strongly affected (Fig 4d). For Bumetamide and EIPA, the response was  
183 clearly decoupled from the volume change, while tension remained constant for DCPIB-treated cells,  
184 perfectly matching the volume dynamics. Overall, these results show that ion channels that participate  
185 in the osmotic balance of the cell, also participate in the coupling between tension and volume changes  
186 during osmotic shocks.

187

188 The rapid recovery of cell volume and tension during hypotonic shocks shows that these parameters are  
189 tightly and actively regulated by the cell. mTORC1 and mTORC2 are involved in cell volume regulation<sup>55</sup>  
190 and membrane tension regulation<sup>29</sup>. Both mTORC1 and mTORC2 are organized around the kinase mTOR,  
191 whose phosphorylation can be inhibited using Torin1 which blocks both complexes<sup>56</sup> while rapamycin is  
192 a specific inhibitor of mTORC1<sup>57</sup>. Knowing that both TORC1 and TORC2 are inhibited by hypertonic  
193 shocks<sup>24–26,58</sup> while TORC2 and mTORC2 are activated by hypotonic shock<sup>26,28,29</sup>, we studied the effect  
194 of Torin1 and rapamycin treatments on the cell response to osmotic shocks. Volume changes induced by  
195 hypotonic shocks were only mildly affected by rapamycin, while Torin1-treated cells exhibited a reduced  
196 volume peak after hypotonic shocks (Fig 4c) when compared to non-treated cells. This suggests a more  
197 central role of mTORC2 in comparison to mTORC1 in controlling volume and tension response. To test  
198 this further, we looked at the dynamics of the tension in both rapamycin and Torin1-treated cells. We  
199 observed an initial peak of tension in rapamycin-treated cells similar to non-treated cells, followed by a  
200 slower recovery of tension. In Torin1-treated cells, no tension changes were observed (Fig 4d). These  
201 results suggest that mTORC2 controls the initial volume/tension coupling, while mTORC2 and mTORC1  
202 are involved in the long-term recovery of both volume and tension. Both rapamycin and Torin1-treated  
203 cells did show significant changes of their volume and tension responses to hypertonic shock, strongly  
204 supporting that the cell response to hypertonic shock is essentially passive (Supp Fig 4d).

## 205 Discussion

206 Our study highlights the quantitative relation between cell volume changes and cell tension changes. We  
207 showed that cell volume changes are mainly due to cytoplasmic volume changes as opposed to changes  
208 in the nucleus volume and confirms that cells modulate their volume according to the PBVH relation.  
209 Interestingly, we observed two phases of cell volume response to osmotic shocks: the short-term response  
210 - a few seconds after the shock - which was characterized by cell volume variations according to the  
211 PBVH relation. The second phase - a few tens of seconds to minutes after the shock - which we called  
212 the long-term response, and which was characterized by an asymmetric recovery. Indeed, cell volume  
213 recovered fast from hypotonic shocks, but did not recover from hypertonic shocks. This asymmetry of  
214 response is probably linked to active counteracting cell processes aimed at mitigating the immediate threat  
215 to cell life by increased membrane tension.

216 During those two phases, we observed that membrane tension followed cell volume changes. In

217 the short-term response, evolution of tension with volume changes was consistent with a model based  
218 on membrane unfolding. Fits to the model yielded an estimate of the size of membrane ruffles and  
219 invaginations – 37nm – consistent with the smallest membrane structures described in the literature,  
220 suggesting that these structures are responsible for the majority of the mechanical response. It also enabled  
221 inferring the change of tension according to the change of pressure applied outside the cells. This result is  
222 qualitatively maintained during the long-term response, as tension dynamically evolves with the same  
223 asymmetry as volume after hypotonic and hypertonic shocks. These results establish that tension passively  
224 follows volume changes during the entire duration of the response and recovery to osmotic shocks.

225 However, this passive coupling between the membrane tension and the cell volume was regulated  
226 by active processes of the cell such as the cytoskeleton, the ion channels and mTOR pathways. By  
227 disrupting actin or depolymerizing microtubules, we observed no difference in the short-term response of  
228 cell volume, consistent with the PBVH relation which does not account for the role of the cytoskeleton.  
229 In the long-term response to a hypotonic shock, membrane tension did not vary at all while cell volume  
230 fully recovered or increased after the recovery, implying a disruption of the coupling between volume  
231 and tension. Conversely, when microtubules were stabilized, the coupling between tension and volume  
232 change was preserved, even if the overall response was dramatically changed. We also found that blocking  
233 ion channels strongly interfered with the cell volume and tension response but their coupling was only  
234 affected for the channels transporting sodium (NHE and NKCC1) as opposed to VRACs. Inhibitors of the  
235 mTOR pathways strongly decoupled tension and volume responses on the long term response but only the  
236 inhibition of mTORC2 lead to a decoupling on the short term response supporting the notion that mTOR  
237 signaling is required for adapting the tension to volume changes. Altogether, those result support the  
238 hypothesis of a regulation of the volume and the tension independent from the regulation of their coupling.

239 Overall, our results support the notion that a large excess of membrane is stored into ruffles main-  
240 tained by the cytoskeleton, and that the recovery is required to restore this large excess. When the cell  
241 volume dramatically increases because of hypotonicity, the cell initially responds by depolymerizing the  
242 cytoskeleton to drive membrane unfolding, which results in a release of membrane surface area. The initial  
243 volume recovery is mediated through ion channels, as the cytoskeleton is still disrupted, and finalized with  
244 actin repolymerization to refold the membrane, under the control of mTOR signaling. Our results show  
245 that the coupling between tension and volume is actively regulated by the cytoskeleton, ion channels and  
246 mTOR signaling to maintain a quantitative relation between volume and tension well described by passive  
247 physical mechanisms.

## 248 **Supplementary information**

### 249 **Nucleus volume change upon osmotic shock**

250 Cells are composed of two main compartments, the cytoplasm and the nucleus. To determine their  
251 respective volume changes, we used fluorescence imaging to measure the volume of the nuclei of HeLa  
252 cells expressing Lamin-B1-GFP – a component of the nucleus membrane – and measure their volume

253 changes under osmotic shocks. The distribution of initial nuclear volumes is narrower than that of overall  
254 cell volumes (Supp Fig 1e) centered on  $800 \pm 150 \mu m^3$ . The qualitative behavior of nuclei under osmotic  
255 shocks was similar to that of the whole cells: their volume rapidly increased two-fold after hypotonic  
256 shocks and then relaxed back, while they rapidly and stably decreased after hypertonic shocks (Supp Fig  
257 1f). In prior studies<sup>37</sup>, no change of volume was detected under hypotonic shock probably because of low  
258 time resolution. Before osmotic shocks, nuclei occupied 24% of the total cell volume. Under hypotonic  
259 shocks (75% water), nuclei represented only 17% of the total cell volume while under hypertonic shocks  
260 (1M sucrose), nucleus represents 46% of the total cell volume (Supp Fig 1g). Those observations highlight  
261 that cell volume changes are essentially due to cytoplasmic volume changes.

## 262 **GFP concentration**

263 To directly measure changes of concentration for a single protein within the cytoplasm, we measured the  
264 relative change of fluorescence of cells overexpressing cytosolic GFP over time (Supp Fig 3f). Overall,  
265 the dynamics of GFP fluorescence was consistent with that of volume and tension: a fast decrease in  
266 fluorescence (corresponding to volume increase) followed by a fast recovery after hypotonic shocks (Supp  
267 Fig 3g), as opposed to a rapid and stable increase of fluorescence after hypertonic shocks (Supp Fig 3g).  
268 As expected, the variation of GFP intensity was always inversely proportional to the volume changes  
269 (Supp Fig 3h).

## 270 **Methods and Materials**

### 271 **Cell culture**

272 Human cervical adenocarcinoma cells HeLa-Kyoto were cultured in DMEM, 4.5g/L glucose (61965-  
273 026, Thermofischer) supplemented with 10% Fetal Bovine Serum FBS (10270-106, Thermofischer) and  
274 1% Penicillin Streptomycin (P/S, Life Technologies, Carlsbad, CA, USA) in a 5% CO<sub>2</sub> incubator (Thermo  
275 Scientific, Waltham, MA, USA). HeLa Kyoto EGFP-LaminB1/H2B-mCherry cells from cell lines service  
276 (CLS, 330919) were used to image the nuclear membrane. Selection pressure for the stably expressed  
277 constructs was kept by adding 0.5mg/mL of G418 and 0.5ug/mL of puromycin in otherwise identical  
278 medium as described above. HL-60/S4 cells (ATCC Cat CRL-3306) were cultured in RPMI medium  
279 (ATCC-modification) supplemented with 10% FBS and 1% P/S in a 5% CO<sub>2</sub> incubator. For all cell  
280 lines, number of passages was kept under 20. Our cells were authenticated by Microsynth and are  
281 mycoplasma-negative, as tested by GATC Biotech and are not on the list of commonly misidentified cell  
282 lines maintained by the International Cell Line Authentication Committee.

### 283 **Apply osmotic shock for live cell imaging**

284 Cells were seeded into 35-mm MatTek glass-bottom microwell dishes and were imaged in Leibovitz  
285 medium (Thermofischer, 21083027) supplemented with 10% Fetal Bovine Serum and 1% Penicillin  
286 Streptomycin. For hypotonic shocks, we simply diluted the cell imaging media with 25%, 50% or 75% of

287 MilliQ water (285 mOsm, 200 mOsm, 125 mOsm). For hypertonic and isotonic shocks, a stock solution of  
288 Leibovitz and sucrose (2M) was diluted to obtain a final osmotic pressure of 550 mOsm, 900 mOsm, 1300  
289 mOsm, 2000 mOsm and 3500 mOsm as well as additional intermediate solutions (Supp Fig 1a-b). We  
290 chose sucrose over salts to avoid changing specific ion concentrations in the medium. Also, sucrose does  
291 not cross the cell membrane, and is not metabolized by HeLa cells. Control hypertonic shocks performed  
292 using sorbitol gave identical results (Supp Fig 5a-b). Under the microscope, 1 mL of shock solution was  
293 added (1-2s) to the imaging dish containing 1mL of isotonic buffer during imaging. Osmotic shocks were  
294 applied 10 seconds before the third time point (2 min). At the end of each experiment, the remaining  
295 buffer was collected and its osmotic pressure was measured using an osmometer (Camlab). Since osmotic  
296 shocks are applied lived under the microscope, no mixing of the solutions is possible. Using fluorescein,  
297 we measured the dilution factor by fluorescence comparing the fluorescence image of the fluorescein  
298 solution alone in a dish and the fluorescence of the solution around the cells after added it to 1 mL of  
299 medium. As sucrose solutions tend not to mix well with other aqueous solutions and to sediment to the  
300 bottom of the imaging chamber, osmolarities of final solutions were corrected by this dilution factor to  
301 obtain osmolarities to which cells were subjected.

### 302 **Image acquisition and analysis for cell volume measurement**

303 Z-stacks were acquired through a spinning-disk confocal composed of a Nikon Ti-E system, a Yokogawa  
304 CSU-X1 Confocal Scanner Unit, a iXon camera (Andor, Belfast, NIR, UK), a Laser stack by Intelligent  
305 Imaging Innovation Inc (3i, Denver, CO, USA), a 37°C incubator (Life Imaging service, Basel, Switzer-  
306 land). All images were acquired with Slidebook software (3i, Denver, CO, USA). In order to measure  
307 single cell volume changes through time, HeLa Kyoto cells were labelled with the plasma membrane  
308 marker CellMask (Thermofischer C10046). Dyes were diluted in cell medium at 1:1000, incubated at  
309 37°C for 10 min. Confocal Z-stacks (400 nm steps) were acquired every minute for 10 minutes. Osmotic  
310 shocks were applied 10 seconds before the third timepoint. Cell 3D images were segmented using a Matlab  
311 home-written code, validated with the Limeseg plugin<sup>59</sup> (Supp Fig 5b) and cell volume and area were ex-  
312 tracted. Cells were segmented using a 3D watershed with an intensity threshold automatically determined  
313 according to the stack pixel distribution of the entire stack. The tracking in time was straightforward since  
314 cells are not moving. Code available on <https://github.com/ChloeRoffay/3D-segmentation-time-tracking>.

### 315 **High-throughput 2D imaging of HL-60/S4 cells for volume estimation**

316 HL-60/S4 cells were collected by centrifugation for 5 min at 180g and resuspended in an osmolarity-  
317 adjusted measurement buffer (MB). MB was based on Leibovitz's L15 medium (no. 21083027, Thermo  
318 Fisher Scientific) supplemented with 10% heat-inactivated FBS, 1% penicillin–streptavidin and 0.6%  
319 (wt/vol) methyl cellulose (4,000 cPs; Alfa Aesar) for increased viscosity that prevents cell sedimentation  
320 during the measurements. The osmolarity of MB was adjusted by addition of sucrose or by mixing  
321 Leibovitz's/FCS-based MB with water-based MB of same viscosity, and measured before each experiment  
322 using a freezing point osmometer (Fiske 210 Micro-Sample Osmometer, Advanced Instruments). 2D

323 bright-field cell images were acquired at high throughput using real-time deformability cytometry<sup>40</sup>  
324 according to previously published procedures<sup>60</sup>. In brief, the cells suspended in MB were introduced to  
325 the microfluidic chip with a syringe pump. The total flow rate was set to  $0.16 \mu\text{Ls}^{-1}$  ( $0.04 \mu\text{Ls}^{-1}$  sample  
326 flow together with  $0.12 \mu\text{Ls}^{-1}$  focusing sheath flow). The time between resuspension of cells and start of  
327 the measurement amounted to roughly 2 min, after that few thousand events were recorded every minute  
328 to follow the cell volume response over time. Cell images were acquired at the end of a  $300\text{-}\mu\text{m}$ -long  
329 channel with a  $30 \times 30 \mu\text{m}^2$  square cross-section at 2,000 frames per second using stroboscopic illumination  
330 with a pulse duration  $< 3 \mu\text{s}$  to avoid motion blurring. The cell contours were detected in real time and cell  
331 area and further parameters were estimated online. Acquired events were filtered for area between  $50\text{--}500$   
332  $\mu\text{m}^2$  to excluded debris and area ratio between 1.00–1.05 to excluded rough or incomplete contours<sup>60</sup>.  
333 Volume of the cells was estimated offline by  $360^\circ$  rotation of upper and lower halves of the 2D cell  
334 contours around the symmetry axis, and averaging the two obtained values<sup>61</sup> using ShapeOut version 1.0.1  
335 (available at <https://github.com/ZELLMCHANIK-DRESDEN/ShapeOut>).

### 336 **Tube pulling experiment**

337 Membrane nanotube pulling experiments were performed on the setup published in<sup>62</sup> allowing simulta-  
338 neous optical tweezer application, spinning disc confocal and brightfield imaging based on an inverted  
339 Nikon eclipse Ti microscope and a 5W 1064nm laser focused through a 100 1.3 NA oil objective (ML5-  
340 CW-P-TKS-OTS, Manlight). A membrane nanotube was formed by displacing the cell's observation  
341 chamber away from a concanavalin-A-coated bead (3.05 mm diameter, Spherotec) held the optical trap,  
342 and previously in contact with the cell to adhere to the cell membrane. The force  $F$  exerted on the bead  
343 was calculated from Hooke's law:  $F = k \cdot x$ , where  $k$  is the stiffness of the trap ( $k = 8.58 \text{ pN} \cdot \text{pix}^{-1} \cdot \text{W}^{-1}$ )  
344 and  $x$  is the displacement of the bead from its initial zero-force position.

### 345 **Image acquisition and analysis for Flipper-TR imaging**

346 Membrane tension measurement were performed on the setup published in<sup>33</sup>. Setup used for imaging is a  
347 Nikon Eclipse Ti A1R microscope equipped with a time-correlated single-photon counting module from  
348 PicoQuant. Excitation was performed using a pulsed 485 nm laser (PicoQuant, LDH-D-C-485) operating  
349 at 20 MHz, and the emission signal was collected through a 600/50 nm bandpass filter using a gated  
350 PMA hybrid 40 detector and a TimeHarp 260 PICO board (PicoQuant). In order to measure membrane  
351 tension changes through time, HeLa Kyoto cells were labelled with Flipper-TR (Spirochrome SC020).  
352 Flipper-TR was dissolved in DMSO at 1 mM stock solutions. Cells were labelled with a 1:1000 dilution  
353 from the DMSO stock, incubated  $37^\circ\text{C}$  for 15 min and slices were acquired every 25 sec for 10 minutes  
354 (Fig 3C) without washing the probe. Osmotic shocks were applied 10 seconds before the second timepoint.  
355 Quality of imaging is altered in DMEM (with or without FBS, independently of phenol-red), such that  
356 all images were acquired in Leibovitz for short-term imaging (less than 2h) or FluoroBrite (A1896701)  
357 for longer times. Lifetimes of Flipper-TR were extracted from FLIM images using SymPhoTime 64  
358 software (PicoQuant) by fitting fluorescence decay data from all pixels to a dual exponential model after

359 deconvoluting the instrument response function (calculated by the software). We selected full images  
360 instead of choosing region of interest because the fitting was mildly affected and the result were more  
361 reproducible. The full-width at half-maximum response of the instrument was measured at 176 ps.

### 362 **Refractive index measurement and processing**

363 The three-dimensional (3D) refractive index (RI) distribution of samples was measured using a custom-  
364 made ODT (Optical Diffraction Tomography) microscope. The optical setup of ODT employs Mach-  
365 Zehnder interferometry in order to measure complex optical fields of light scattered by samples from  
366 various incident angles, as shown in<sup>52</sup>. A coherent laser beam (wavelength = 532 nm, frequency-doubled  
367 Nd-YAG laser, Torus, Laser Quantum, Inc., UK) is divided into two beams by a 2x2 single-mode fiber  
368 optic coupler. One beam is used as a reference beam and the other beam illuminates the specimen on  
369 the stage of a custom-made inverted microscope through a tube lens ( $f = 175$  mm) and a high numerical  
370 aperture (NA) objective lens (NA = 1.2, 63x, water immersion, Carl Zeiss AG, Germany). To reconstruct  
371 a 3D RI tomogram of samples in a field-of-view, the samples are illuminated with 150 various incident  
372 angles scanned by a dual-axis galvanomirror (GVS012/M, Thorlabs Inc., USA). The diffracted beam from  
373 a sample is collected by a high NA objective lens (NA = 1.3, 100x, oil immersion, Carl Zeiss AG) and a  
374 tube lens ( $f = 200$  mm). The total magnification is set to be 90.5x. The beam diffracted by the sample  
375 interferes with the reference beam at the image plane, and generates a spatially modulated hologram. The  
376 hologram is recorded with a CCD camera (FL3-U3-13Y3M-C, FLIR Systems, Inc., USA). From measured  
377 holograms, the 3D RI tomograms are reconstructed by the Fourier diffraction theorem employing the  
378 first-order Rytov approximation<sup>51,63</sup>. Cells were manually segmented based on the epifluorescence image  
379 of the membrane (CellMask staining as previously described). Cell's basis was automatically detected to  
380 correct the z-drift. By applying the segmented ROI to the projection of the RI tomogram onto the cell's  
381 basis plane, pixels value of RI were extracted, averaged over the entire cell, and averaged over many cells  
382 for each osmotic condition.

### 383 **Image acquisition and analysis of the cytoskeleton**

384 In order to measure actin or tubulin intensity changes through time, HeLa Kyoto cells were labelled with the  
385 plasma membrane marker Cell Mask orange (Thermofischer C10045) and SiR-actin (SC001, Spirochrome)  
386 or SiR-tubulin (SC002, Spirochrome). Dyes were dissolved in DMSO at a stock concentration of 1mM,  
387 and diluted 1:1000 in cell's medium, incubated at 37°C for 20 min to label cells. Cells were then imaged  
388 as described above. Cells were manually segmented and average intensity was extracted using ImageJ.

### 389 **Drug treatment**

390 Concentrations of drugs was kept constant through the experiment. Cell were initially incubated in culture  
391 DMEM with drugs at 37°C (see below drugs concentration, incubation time). DMEM was replaced by  
392 Leibovitz with drugs and CellMask or Flipper-TR. The osmotic shocks were applied as before except  
393 that the solution contains the same drugs concentration. The following pharmacological inhibitors and



394 chemical compounds were used : 50 nM Latrunculin A for 1h (SIGMA L5163), 200 nM Jasplakinolide  
395 for 30 min (ENZO ALX-350-275), 5  $\mu$ M Nocodazole for 30 min (SIGMA M1404), 1  $\mu$ M Taxol for 1h  
396 (SIGMA T1912), 100  $\mu$ M DCPIB for 30 min (TOCRIS 1540), 50  $\mu$ M EIPA for 30 min (TOCRIS 3378),  
397 100  $\mu$ M Bumetamide for 30 min (SIGMA B3023), 250 nM Torin1 for 30 min (LC Lab T-7887) and 100  
398 nM Rapamycin for 30 min (LC Lab R-5000).

## 399 **GFP experiments**

400 pGFP was transfected using FuGENE®6 Transfection Reagent (E2691, Promega) with OptiMEM (31985088,  
401 Thermofischer). Transfected Hela Kyoto cells were image with the same spinning disk confocal set-up,  
402 single confocal planes being acquired every second for 10 minutes. Nikon's Perfect Focusing System was  
403 used to keep focus during the entire osmotic shock. Cells were manually segmented using ImageJ and the  
404 mean fluorescence was extracted through time. For each cell, values were normalized to the initial value.

405 All images were constructed using ImageJ. All graphs were constructed with GraphPad Prism 8.

## 406 **Acknowledgments**

407 We thank K. Roux, R. Wimbish and N. Kléna for critical reading of the manuscript, and C. Tomba  
408 for discussions. AR acknowledges funding from Human Frontier Science Program Young Investi-  
409 gator Grant RGY0076/2009-C, the Swiss National Fund for Research Grants N31003A\_149975 and  
410 N31003A\_173087, and Synergia Grant N CRSII5\_189996, the European Research Council Consolidator  
411 Grant N 311536, and Synergy Grant N951324-R2-TENSION.

## 412 **Author contributions**

413 C.R. and A.R. designed the research. C.R., G.M., K.K., V.B., M.U. performed all experiments and image  
414 analyses. V.M., J.G.C., S.M, J.G. contributed with tools and technique. M.L. did the theoretical models.  
415 C.T. and A.R. wrote the manuscript, with editions from K.K, M.U., V.M., J.G and M.L.

## 416 **Competing financial interests**

417 Authors declare no competing interests.

## 418 **References**

- 419 **1.** Le Roux, A.-L., Quiroga, X., Walani, N., Arroyo, M. & Roca-Cusachs, P. The plasma membrane as  
420 a mechanochemical transducer. *Philos. Transactions Royal Soc. B: Biol. Sci.* **374**, 20180221, DOI:  
421 [10.1098/rstb.2018.0221](https://doi.org/10.1098/rstb.2018.0221) (2019).
- 422 **2.** Hamill, O. P. & Martinac, B. Molecular Basis of Mechanotransduction in Living Cells. *Physiol. Rev.*  
423 **81**, 685–740, DOI: [10.1152/physrev.2001.81.2.685](https://doi.org/10.1152/physrev.2001.81.2.685) (2001).

- 424 **3.** Gauthier, N. C., Masters, T. A. & Sheetz, M. P. Mechanical feedback between membrane tension and  
425 dynamics. *Trends Cell Biol.* **22**, 527–535, DOI: [10.1016/j.tcb.2012.07.005](https://doi.org/10.1016/j.tcb.2012.07.005) (2012).
- 426 **4.** Sitarska, E. & Diz-Muñoz, A. Pay attention to membrane tension: Mechanobiology of the cell surface.  
427 *Curr Opin Cell Biol* **66**, 11–18 (2020).
- 428 **5.** Pedersen, S. F., Hoffmann, E. K. & Mills, J. W. The cytoskeleton and cell volume regulation. *Comp.*  
429 *Biochem. Physiol. Part A, Mol. & Integr. Physiol.* **130**, 385–399, DOI: [10.1016/s1095-6433\(01\)](https://doi.org/10.1016/s1095-6433(01)00429-9)  
430 [00429-9](https://doi.org/10.1016/s1095-6433(01)00429-9) (2001).
- 431 **6.** Pan, L. *et al.* Hypotonic Stress Induces Fast, Reversible Degradation of the Vimentin Cytoskeleton  
432 via Intracellular Calcium Release. *Adv. Sci.* **6**, 1900865, DOI: [10.1002/advs.201900865](https://doi.org/10.1002/advs.201900865) (2019).
- 433 **7.** Dai, J., Sheetz, M. P., Wan, X. & Morris, C. E. Membrane Tension in Swelling and Shrinking  
434 Molluscan Neurons. *J. Neurosci.* **18**, 6681–6692, DOI: [10.1523/JNEUROSCI.18-17-06681.1998](https://doi.org/10.1523/JNEUROSCI.18-17-06681.1998)  
435 (1998).
- 436 **8.** Guilak, F., Erickson, G. R. & Ting-Beall, H. P. The effects of osmotic stress on the viscoelastic and  
437 physical properties of articular chondrocytes. *Biophys J* **82**, 720–727 (2002).
- 438 **9.** Raucher, D. & Sheetz, M. P. Characteristics of a Membrane Reservoir Buffering Membrane Tension.  
439 *Biophys. J.* **77**, 1992–2002, DOI: [10.1016/S0006-3495\(99\)77040-2](https://doi.org/10.1016/S0006-3495(99)77040-2) (1999).
- 440 **10.** Chhabra, E. S. & Higgs, H. N. The many faces of actin: matching assembly factors with cellular  
441 structures. *Nat. Cell Biol.* **9**, 1110–1121 (2007).
- 442 **11.** Gillespie, P. G. & Walker, R. G. Molecular basis of mechanosensory transduction. *Nature* **413**,  
443 194–202, DOI: [10.1038/35093011](https://doi.org/10.1038/35093011) (2001).
- 444 **12.** Reeves, D., Ursell, T., Sens, P., Kondev, J. & Phillips, R. Membrane mechanics as a probe of  
445 ion-channel gating mechanisms. *Phys. Rev. E* **78**, 041901, DOI: [10.1103/PhysRevE.78.041901](https://doi.org/10.1103/PhysRevE.78.041901)  
446 (2008).
- 447 **13.** Hua, S. Z., Gottlieb, P. A., Heo, J. & Sachs, F. A mechanosensitive ion channel regulating cell volume.  
448 *Am. J. Physiol. Physiol.* **298**, C1424–C1430, DOI: [10.1152/ajpcell.00503.2009](https://doi.org/10.1152/ajpcell.00503.2009) (2010).
- 449 **14.** Martinac, B. The ion channels to cytoskeleton connection as potential mechanism of mechanosensi-  
450 tivity. *Biochimica et Biophys. Acta (BBA) - Biomembr.* **1838**, 682–691, DOI: [10.1016/j.bbamem.2013.](https://doi.org/10.1016/j.bbamem.2013.07.015)  
451 [07.015](https://doi.org/10.1016/j.bbamem.2013.07.015) (2014).
- 452 **15.** Syeda, R. *et al.* LRRC8 Proteins Form Volume-Regulated Anion Channels that Sense Ionic Strength.  
453 *Cell* **164**, 499–511, DOI: [10.1016/j.cell.2015.12.031](https://doi.org/10.1016/j.cell.2015.12.031) (2016).
- 454 **16.** Kern, D. M., Oh, S., Hite, R. K. & Brohawn, S. G. Cryo-EM structures of the DCPIB-inhibited volume-  
455 regulated anion channel LRRC8A in lipid nanodiscs. *eLife* **8**, e42636, DOI: [10.7554/eLife.42636](https://doi.org/10.7554/eLife.42636)  
456 (2019).

- 457 **17.** Jentsch, T. J. VRACs and other ion channels and transporters in the regulation of cell volume and  
458 beyond. *Nat. Rev. Mol. Cell Biol.* **17**, 293–307, DOI: [10.1038/nrm.2016.29](https://doi.org/10.1038/nrm.2016.29) (2016).
- 459 **18.** Voss, F. K. *et al.* Identification of LRRC8 Heteromers as an Essential Component of the Volume-  
460 Regulated Anion Channel VRAC. *Science* **344**, 634–638, DOI: [10.1126/science.1252826](https://doi.org/10.1126/science.1252826) (2014).
- 461 **19.** Hoffmann, E. K., Lambert, I. H. & Pedersen, S. F. Physiology of Cell Volume Regulation in  
462 Vertebrates. *Physiol. Rev.* **89**, 193–277, DOI: [10.1152/physrev.00037.2007](https://doi.org/10.1152/physrev.00037.2007) (2009).
- 463 **20.** Moeendarbary, E. *et al.* The cytoplasm of living cells behaves as a poroelastic material. *Nat. Mater.*  
464 **12**, 253–261, DOI: [10.1038/nmat3517](https://doi.org/10.1038/nmat3517) (2013).
- 465 **21.** Diz-Muñoz, A., Fletcher, D. A. & Weiner, O. D. Use the force: membrane tension as an organizer of  
466 cell shape and motility. *Trends Cell Biol.* **23**, 47–53, DOI: [10.1016/j.tcb.2012.09.006](https://doi.org/10.1016/j.tcb.2012.09.006) (2013).
- 467 **22.** Hohmann, S. Osmotic Stress Signaling and Osmoadaptation in Yeasts. *Microbiol. Mol. Biol. Rev.* **66**,  
468 300–372, DOI: [10.1128/MMBR.66.2.300-372.2002](https://doi.org/10.1128/MMBR.66.2.300-372.2002) (2002).
- 469 **23.** Christoph, K., Beck, F.-X. & Neuhofer, W. Osmoadaptation of Mammalian Cells – An Orchestrated  
470 Network of Protective Genes. *Curr. Genomics* **8**, 209–218 (2007).
- 471 **24.** Lee, Y. J., Jeschke, G. R., Roelants, F. M., Thorner, J. & Turk, B. E. Reciprocal phosphorylation of  
472 yeast glycerol-3-phosphate dehydrogenases in adaptation to distinct types of stress. *Mol. Cell. Biol.*  
473 **32**, 4705–4717, DOI: [10.1128/MCB.00897-12](https://doi.org/10.1128/MCB.00897-12) (2012).
- 474 **25.** Muir, A., Roelants, F. M., Timmons, G., Leskoske, K. L. & Thorner, J. Down-regulation of TORC2-  
475 Ypk1 signaling promotes MAPK-independent survival under hyperosmotic stress. *eLife* **4**, DOI:  
476 [10.7554/eLife.09336](https://doi.org/10.7554/eLife.09336) (2015).
- 477 **26.** Riggi, M. *et al.* Decrease in plasma membrane tension triggers PtdIns(4,5)P<sub>2</sub> phase separation to  
478 inactivate TORC2. *Nat. Cell Biol.* **20**, 1043–1051, DOI: [10.1038/s41556-018-0150-z](https://doi.org/10.1038/s41556-018-0150-z) (2018).
- 479 **27.** Riggi, M., Kusmider, B. & Loewith, R. The flipside of the TOR coin - TORC2 and plasma membrane  
480 homeostasis at a glance. *J. Cell. Sci.* **133** (2020).
- 481 **28.** Berchtold, D. *et al.* Plasma membrane stress induces relocalization of Slm proteins and activation  
482 of TORC2 to promote sphingolipid synthesis. *Nat. Cell Biol.* **14**, 542–547, DOI: [10.1038/ncb2480](https://doi.org/10.1038/ncb2480)  
483 (2012).
- 484 **29.** Diz-Muñoz, A. *et al.* Membrane Tension Acts Through PLD2 and mTORC2 to Limit Actin Network  
485 Assembly During Neutrophil Migration. *PLoS Biol* **14**, e1002474 (2016).
- 486 **30.** Riggi, M. *et al.* TORC2 controls endocytosis through plasma membrane tension. *The J. Cell Biol.*  
487 **218**, 2265–2276, DOI: [10.1083/jcb.201901096](https://doi.org/10.1083/jcb.201901096) (2019).
- 488 **31.** Jacinto, E. *et al.* Mammalian TOR complex 2 controls the actin cytoskeleton and is rapamycin  
489 insensitive. *Nat. Cell Biol.* **6**, 1122–1128, DOI: [10.1038/ncb1183](https://doi.org/10.1038/ncb1183) (2004).

- 490 **32.** Pietuch, A., Brückner, B. R. & Janshoff, A. Membrane tension homeostasis of epithelial cells through  
491 surface area regulation in response to osmotic stress. *Biochimica et Biophys. Acta (BBA) - Mol. Cell*  
492 *Res.* **1833**, 712–722, DOI: [10.1016/j.bbamcr.2012.11.006](https://doi.org/10.1016/j.bbamcr.2012.11.006) (2013).
- 493 **33.** Colom, A. *et al.* A fluorescent membrane tension probe. *Nat. Chem.* **10**, 1118–1125, DOI: [10.1038/s41557-018-0127-3](https://doi.org/10.1038/s41557-018-0127-3) (2018).
- 495 **34.** Ayee, M. A. A., LeMaster, E., Teng, T., Lee, J. & Levitan, I. Hypotonic Challenge of Endothelial  
496 Cells Increases Membrane Stiffness with No Effect on Tether Force. *Biophys. J.* **114**, 929–938 (2018).
- 497 **35.** Boulant, S., Kural, C., Zeeh, J.-C., Ubelmann, F. & Kirchhausen, T. Actin dynamics counteract  
498 membrane tension during clathrin-mediated endocytosis. *Nat. Cell Biol.* **13**, 1124–1131, DOI:  
499 [10.1038/ncb2307](https://doi.org/10.1038/ncb2307) (2011).
- 500 **36.** Sinha, B. *et al.* Cells Respond to Mechanical Stress by Rapid Disassembly of Caveolae. *Cell* **144**,  
501 402–413, DOI: [10.1016/j.cell.2010.12.031](https://doi.org/10.1016/j.cell.2010.12.031) (2011).
- 502 **37.** Finan, J. D., Chalut, K. J., Wax, A. & Guilak, F. Nonlinear Osmotic Properties of the Cell Nucleus.  
503 *Annals Biomed. Eng.* **37**, 477–491, DOI: [10.1007/s10439-008-9618-5](https://doi.org/10.1007/s10439-008-9618-5) (2009).
- 504 **38.** Zhou, E. H. *et al.* Universal behavior of the osmotically compressed cell and its analogy to the  
505 colloidal glass transition. *Proc. Natl. Acad. Sci.* **106**, 10632–10637, DOI: [10.1073/pnas.0901462106](https://doi.org/10.1073/pnas.0901462106)  
506 (2009).
- 507 **39.** Katkov, I. I. On proper linearization, construction and analysis of the Boyle-van't Hoff plots and  
508 correct calculation of the osmotically inactive volume. *Cryobiology* **62**, 232–241 (2011).
- 509 **40.** Otto, O. *et al.* Real-time deformability cytometry: on-the-fly cell mechanical phenotyping. *Nat.*  
510 *Methods* **12**, 199–202 (2015).
- 511 **41.** Brochard-Wyart, F., Borghi, N., Cuvelier, D. & Nassoy, P. Hydrodynamic narrowing of tubes extruded  
512 from cells. *Proc. Natl. Acad. Sci.* **103**, 7660–7663, DOI: [10.1073/pnas.0602012103](https://doi.org/10.1073/pnas.0602012103) (2006).
- 513 **42.** Dal Molin, M. *et al.* Fluorescent Flippers for Mechanosensitive Membrane Probes. *J. Am. Chem. Soc.*  
514 **137**, 568–571, DOI: [10.1021/ja5107018](https://doi.org/10.1021/ja5107018) (2015).
- 515 **43.** Soleimanpour, S. *et al.* Headgroup engineering in mechanosensitive membrane probes. *Chem.*  
516 *Commun.* **52**, 14450–14453, DOI: [10.1039/C6CC08771J](https://doi.org/10.1039/C6CC08771J) (2016).
- 517 **44.** Mercier, V. *et al.* Endosomal membrane tension regulates ESCRT-III-dependent intra-luminal vesicle  
518 formation. *Nat. Cell Biol.* **22**, 947–959 (2020).
- 519 **45.** Nava, M. M. *et al.* Heterochromatin-Driven Nuclear Softening Protects the Genome against Mechani-  
520 cal Stress-Induced Damage. *Cell* **181**, 800–817 (2020).
- 521 **46.** Hetmanski, J. H. R. *et al.* Membrane Tension Orchestrates Rear Retraction in Matrix-Directed Cell  
522 Migration. *Dev Cell* **51**, 460–475 (2019).

- 523 **47.** Ponder, E. Hemolysis and Related Phenomena. *Grune Stratton, New-York* (1948).
- 524 **48.** Xu, Y. *et al.* A single-cell identification and capture chip for automatically and rapidly determining  
525 hydraulic permeability of cells. *Anal Bioanal Chem* **412**, 4537–4548 (2020).
- 526 **49.** Pontes, B., Monzo, P. & Gauthier, N. C. Membrane tension: A challenging but universal physical  
527 parameter in cell biology. *Semin. Cell & Dev. Biol.* **71**, 30–41, DOI: [10.1016/j.semcdb.2017.08.030](https://doi.org/10.1016/j.semcdb.2017.08.030)  
528 (2017).
- 529 **50.** Richter, T. *et al.* High-Resolution 3D Quantitative Analysis of Caveolar Ultrastructure and Cave-  
530 ola–Cytoskeleton Interactions. *Traffic* **9**, 893–909, DOI: [10.1111/j.1600-0854.2008.00733.x](https://doi.org/10.1111/j.1600-0854.2008.00733.x) (2008).
- 531 **51.** Sung, Y. *et al.* Optical diffraction tomography for high resolution live cell imaging. *Opt Express* **17**,  
532 266–277 (2009).
- 533 **52.** Kim, K. & Guck, J. The Relative Densities of Cytoplasm and Nuclear Compartments Are Robust  
534 against Strong Perturbation. *Biophys J* (2020).
- 535 **53.** Zhao, H., Brown, P. & Schuck, P. On the Distribution of Protein Refractive Index Increments. *Biophys.*  
536 *J.* **100**, 2309–2317, DOI: [10.1016/j.bpj.2011.03.004](https://doi.org/10.1016/j.bpj.2011.03.004) (2011).
- 537 **54.** Schlögl, R. *et al.* Mechanical Mapping of Spinal Cord Growth and Repair in Living Zebrafish  
538 Larvae by Brillouin Imaging. *Biophys. J.* **115**, 911–923 (2018).
- 539 **55.** Demian, W. L. *et al.* The Ion Transporter NKCC1 Links Cell Volume to Cell Mass Regulation by  
540 Suppressing mTORC1. *Cell Reports* **27**, 1886–1896.e6, DOI: [10.1016/j.celrep.2019.04.034](https://doi.org/10.1016/j.celrep.2019.04.034) (2019).
- 541 **56.** Liu, Q. *et al.* Discovery of 1-(4-(4-Propionylpiperazin-1-yl)-3-(trifluoromethyl)phenyl)-9-(quinolin-  
542 3-yl)benzo[h][1,6]naphthyridin-2(1H)-one as a Highly Potent, Selective Mammalian Target of Ra-  
543 pamycin (mTOR) Inhibitor for the Treatment of Cancer. *J. Medicinal Chem.* **53**, 7146–7155, DOI:  
544 [10.1021/jm101144f](https://doi.org/10.1021/jm101144f) (2010).
- 545 **57.** Boutouja, F., Stiehm, C. M. & Platta, H. W. mTOR: A Cellular Regulator Interface in Health and  
546 Disease. *Cells* **8**, DOI: [10.3390/cells8010018](https://doi.org/10.3390/cells8010018) (2019).
- 547 **58.** Plescher, M., Teleanu, A. A. & Demetriades, C. TSC2 mediates hyperosmotic stress-induced  
548 inactivation of mTORC1. *Sci Rep* **5**, 13828 (2015).
- 549 **59.** Machado, S., Mercier, V. & Chiaruttini, N. LimeSeg: a coarse-grained lipid membrane simulation for  
550 3D image segmentation. *BMC Bioinforma.* **20**, 2 (2019).
- 551 **60.** Urbanska, M., Rosendahl, P., Krüger, M. & Guck, J. High-throughput single-cell mechanical pheno-  
552 typing with real-time deformability cytometry. *Methods Cell Biol* **147**, 175–198 (2018).
- 553 **61.** Herbig, M. *et al.* Real-time Deformability Cytometry: Label-free functional characterization of cells.  
554 *Flow Cytom. Protoc. (Human Press.* 347–369 (2017).

- 555 **62.** Chiaruttini, N. *et al.* Relaxation of Loaded ESCRT-III Spiral Springs Drives Membrane Deformation.  
556 *Cell* **163**, 866–879 (2015).
- 557 **63.** Wolf, E. Three-dimensional structure determination of semi-transparent objects from holographic  
558 data. *Opt. Commun* **1**, 153–156 (1969).

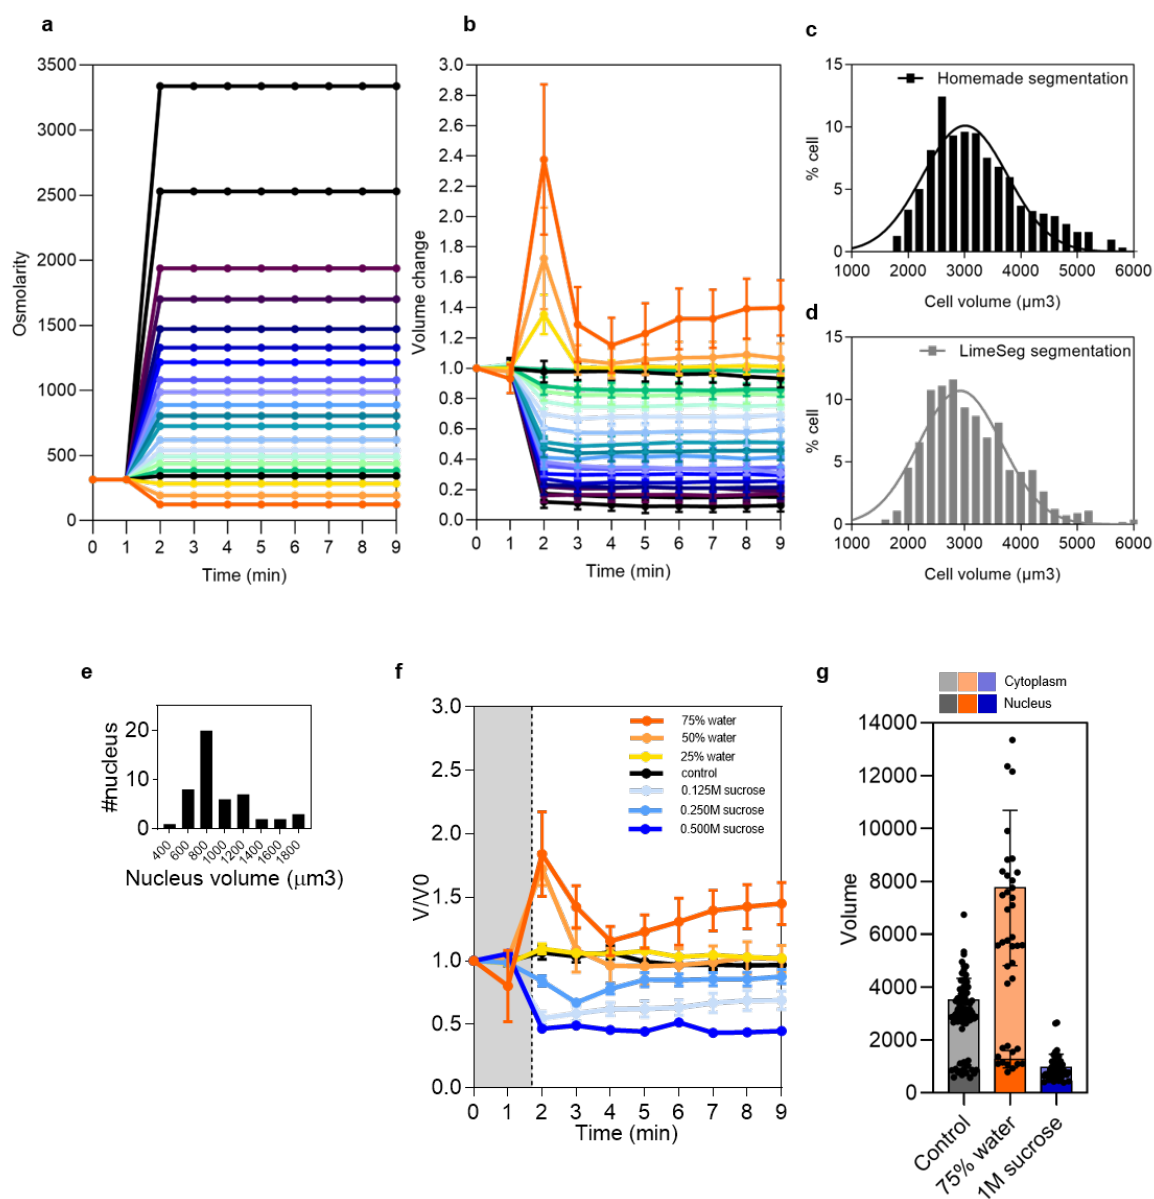

**Figure 1. Supplementary II Measure cell volume, nucleus volume and osmotic pressure.** **a**, Osmolarity changes during time. **b**, Volume changes during time. **c**, Cell volume distribution in isotonic conditions measured with the homemade segmentation ( $n = 959$ ). **d**, Cell volume distribution in isotonic conditions measured with the LimeSeg segmentation ( $n = 578$ ). **e**, Distribution of nucleus size in isotonic medium. **f**, Single nucleus volume dynamic under osmotic shock. **g**, Relative contribution of nucleus and cytoplasm to cell volume changes under hypotonic shock (75% water - orange) and hypertonic shock (1M sucrose - blue).

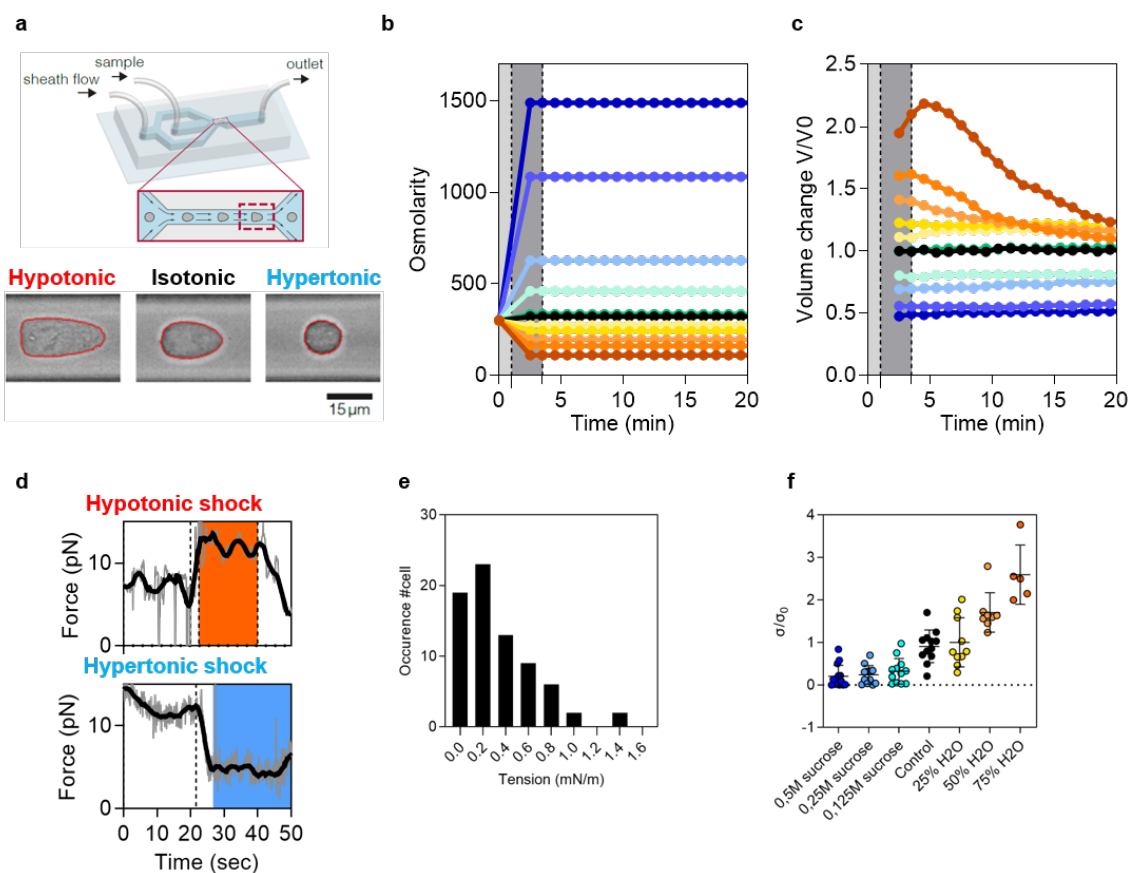

**Figure 2. Supplementary II Measure nucleus volume, use RT-DC and measure tension with tube pulling.** **a**, RT-DC principles. **b**, Osmolarity changes under osmotic shocks with RT-DC measurement. **c**, Cell volume dynamic under osmotic shocks with RT-DC measurement. **d**, Force measurement under osmotic conditions (top hypotonic shock, bottom hypertonic shock). **e**, Distribution of initial tether force to pull a cell membrane tube (isotonic condition). **f**, Relative tension measurement under osmotic conditions.



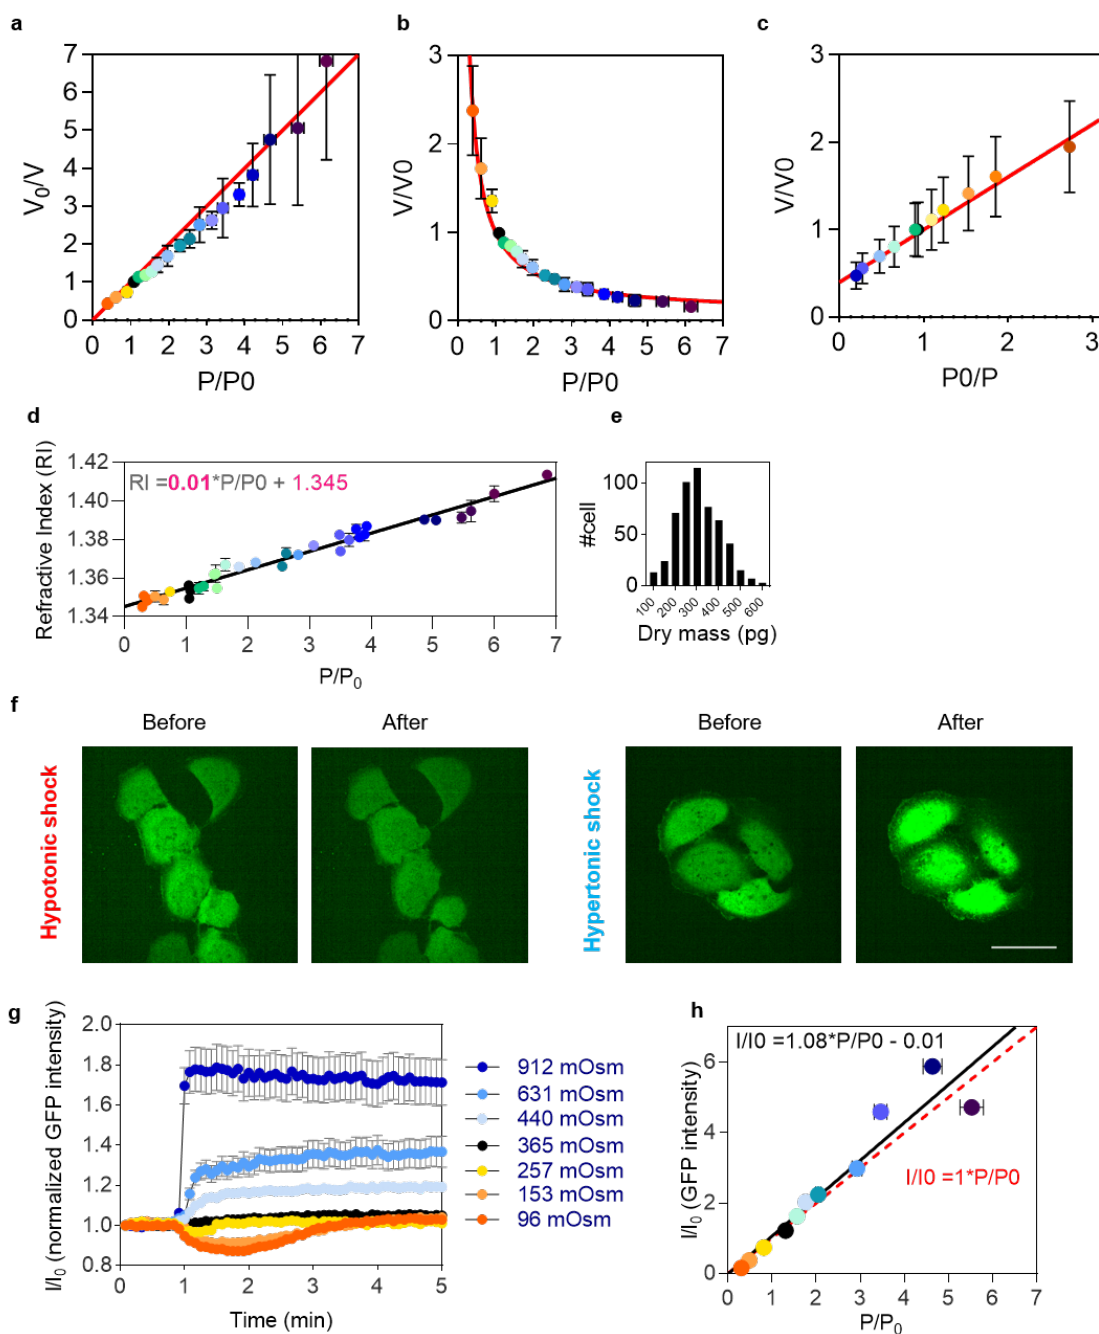

**Figure 3. Supplementary II Quantitative coupling of cell membrane tension to osmotic shocks and diffusion data. a,** Inverse of volume change ( $V_0/V$ ) according to pressure change ( $P/P_0$ ) in HeLa cells. **b,** Volume change ( $V/V_0$ ) according to pressure change ( $P/P_0$ ) in HeLa cells. **c,** Ponder's relation measuring volume with RT-DC in HL-60/S4 cells. **d,** Refractive index of cell according to change of pressure ( $P/P_0$ ). **e,** Distribution of dry mass (pg) in isotonic medium. **f,** GFP transfected cells under hypotonic shock (left) and hypertonic shock (right). **g,** Relative change of intensity ( $I/I_0$ ) in time for various osmolarities. **h,** Relative change of intensity ( $I/I_0$ ) according to pressure changes ( $P/P_0$ ).

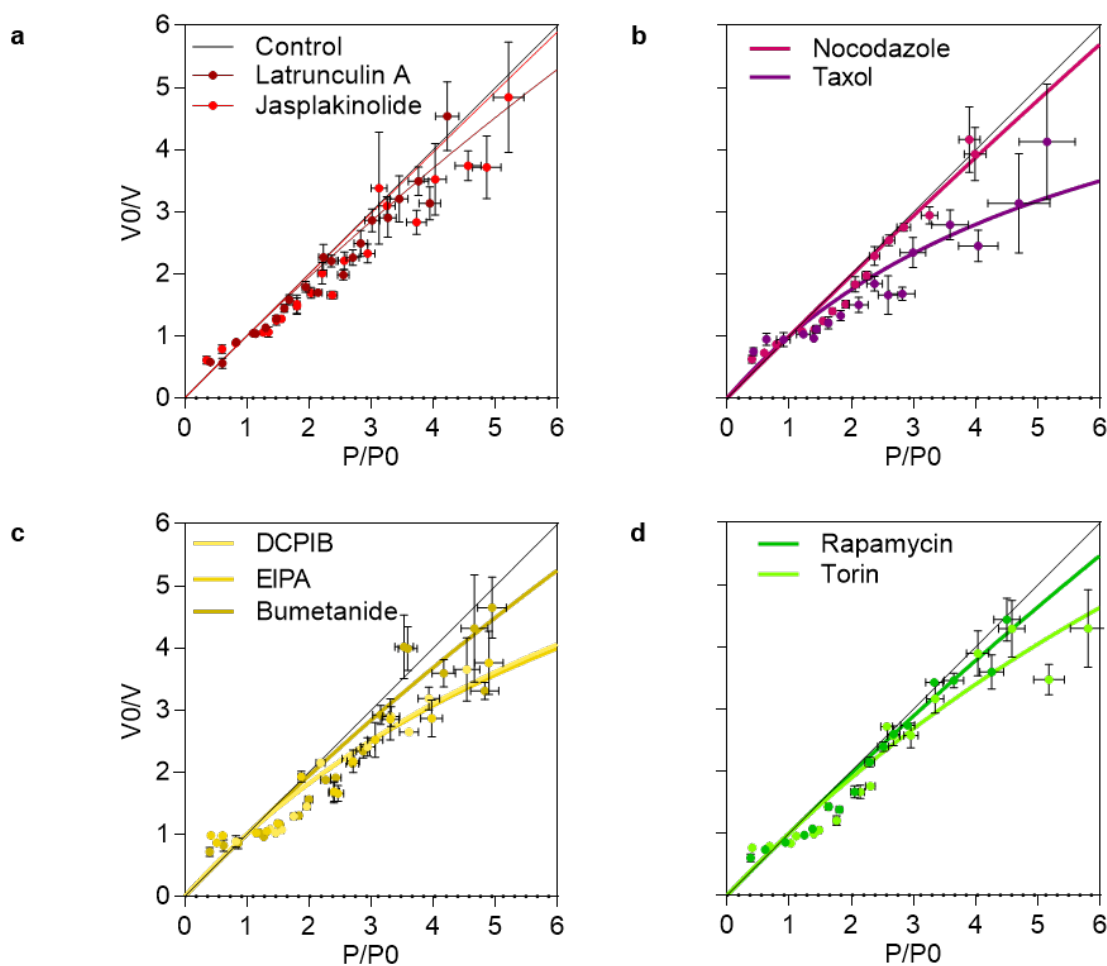

**Figure 4. Supplementary II Ponder's relation and cell volume under drug treatment** a, Ponder's relation for latrunculin A or jasplakinolide treated cells. b, Ponder's relation for nocodazole or taxol treated cells. c, Ponder's relation for DCPIB or EIPA or Bumetanide treated cells. d, Ponder's relation for rapamycin or Torin1 treated cells.

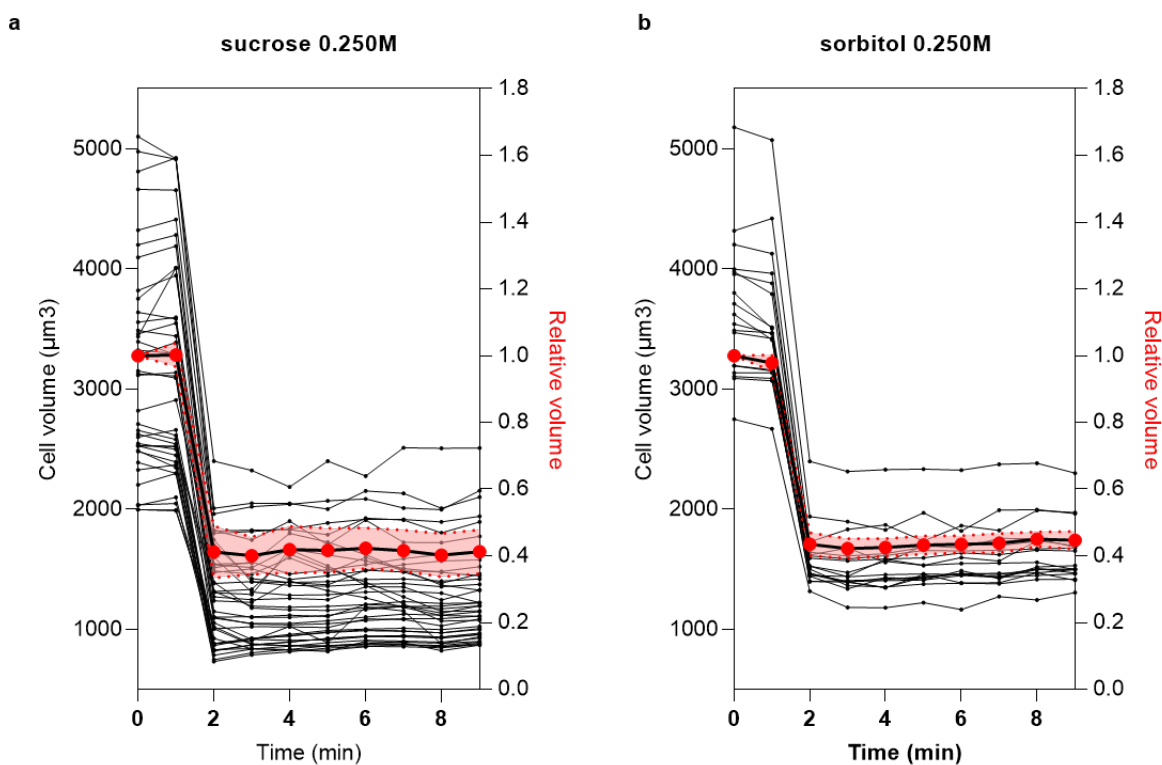

**Figure 5. Supplementary II Protein concentration changes using refractive index (RI) measurement. a,** Absolute volume of cells undergoing a sucrose hypertonic shocks 0.250M (each black line are individual cells) and relative volume changes of all the cells. **b,** Absolute volume of cells undergoing a sorbitol hypertonic shocks 0.250M (each black line are individual cells) and relative volume changes of all the cells.

# Quantitative coupling of cell volume and membrane tension during osmotic shocks

## Supplemental mathematical modeling

Roffay *et al.*

To account for the experimentally observed relationship between membrane area and tension shown in Fig. 2b of the main text, we assume that a tensionless membrane is not flat. Instead, its curvature is dictated by a collection of protein scaffolds of possibly disparate types, including caveolins, other membrane-bound proteins and attachments to the cytoskeleton. As the membrane tension is increased, these “ruffles” unfold, increasing the membrane’s projected area. Our model is athermal, as the additional excess membrane area stored in the membrane’s thermal fluctuations is in practice small compared to the areas considered here.

The Hamiltonian for the roughened membrane reads

$$\mathcal{H} = \iint \left\{ \frac{\kappa}{2} [\Delta h(\mathbf{r}) - c_0(\mathbf{r})]^2 + \frac{\sigma}{2} \nabla h(\mathbf{r})^2 \right\} d^2\mathbf{r} \quad (1)$$

where  $h(\mathbf{r})$  is the height function of the membrane. This is the standard Helfrich Hamiltonian in the Monge gauge, except for a spacially varying spontaneous curvature  $c_0(\mathbf{r})$  representing the built-in curvature due to membrane-protein interactions. We define  $c_0(\mathbf{r})$  as a random function, reflecting the messy character of the static protein-induced membrane ruffles. Specifically, we make it a Gaussian variable with a characteristic correlation length  $a$  that fixes the typical size of the ruffles. Formally, this reads

$$\langle c_0(\mathbf{r}) \rangle = 0 \quad (2a)$$

$$\langle c_0(\mathbf{r})c_0(\mathbf{r}') \rangle = C^2 \exp\left(-\frac{|\mathbf{r} - \mathbf{r}'|}{a}\right) \quad (2b)$$

The first equation implies a zero mean curvature. This is not a critical assumption however, as setting a non-zero mean curvature does not change the final result of our calculation. The constant  $C$  gives the typical magnitude of the local curvature. Fourier transforming the two-point correlator yields

$$\langle \tilde{c}_0(\mathbf{q})\tilde{c}_0(\mathbf{q}') \rangle = (2\pi)^2 \delta(\mathbf{q} + \mathbf{q}') \frac{2\pi(Ca)^2}{[1 + (qa)^2]^{3/2}}, \quad (3)$$

where  $q$  is the modulus of the wavevector  $\mathbf{q}$ .

Minimizing the Hamiltonian with respect to the height function  $h(\mathbf{r})$  yields the mechanical equilibrium equations for this system. In Fourier space:

$$\tilde{h}(\mathbf{q}) = -\frac{\tilde{c}_0(\mathbf{q})}{q^2 + \sigma/\kappa}. \quad (4)$$

We compute the ratio of the real membrane area to the apparent (projected) area in the Monge gauge as

$$\frac{A_{\text{real}}}{A_{\text{app}}(\sigma)} = 1 + \left\langle \iint \left[ \frac{\nabla h(\mathbf{r})^2}{2} \right] d^2\mathbf{r} \right\rangle. \quad (5)$$

Taking this expression to Fourier space and combining Eqs. (3) and (4) finally yields

$$\frac{A_{\text{real}} - A_{\text{app}}(\sigma)}{C^2 A_{\text{app}}(\sigma)^2} = g(\Sigma), \quad (6)$$

where  $\Sigma = \sigma a^2 / \kappa$  and the function  $g$  is given by

$$g(\Sigma) = \frac{(\Sigma + 2) \sec^{-1}(\sqrt{\Sigma}) - 3\sqrt{\Sigma - 1}}{4(\Sigma - 1)^{5/2}}. \quad (7)$$

To find the apparent area of the membrane, we solve Eq. (6) for  $A_{\text{app}}$ . In the thermodynamic limit, the stored area of the membrane in the zero-tension limit is huge; in other words  $C^2 A_{\text{real}} \rightarrow +\infty$ . In this limit the area ratio plotted in Fig. 2b simply reads

$$\frac{\Delta A}{A_0} = \frac{A_{\text{app}}(\sigma) - A_{\text{app}}(\sigma_0)}{A_{\text{app}}(\sigma_0)} = \sqrt{\frac{g(\Sigma_0)}{g(\Sigma)}} - 1 = \sqrt{\frac{g(f_0^2/\bar{f}^2)}{g(f^2/\bar{f}^2)}} - 1, \quad (8)$$

where  $\sigma_0$  is some reference tension (the isotonic value) and  $\Sigma_0$  is its dimensionless counterpart. In the last equality we moreover introduce the directly measurable tube force  $f = 2\pi\sqrt{2\kappa\sigma}$ , its isotonic value  $f_0$  as well as the characteristic force  $\bar{f} = 2^{3/2}\pi\kappa/a$ . Using the last expression of Eq. (8) as a fitting function for the experimentally measured  $\Delta A/A_0$  vs.  $f^2$  curve (where  $f^2$  is measured post-osmotic shock) we find the following values for our fit parameters:

$$f_0 = 28 \text{ pN} \quad (9a)$$

$$\bar{f} = 19 \text{ pN}. \quad (9b)$$

The fit is presented as a line in Fig. 2b. Assuming a bending modulus  $\kappa = 20k_B T$  for the membrane inside the tube, these values yield

$$\sigma_0 = 1.2 \times 10^{-4} \text{ N} \cdot \text{m}^{-1} \quad (10a)$$

$$a = 37 \text{ nm}. \quad (10b)$$

The former value appears pretty typical for a cell membrane tension. The latter value is more informative: the typical size of the membrane ruffles is of the order of a few tens of nanometers.

One might finally ask what fraction of the total area is stored in ruffles under isotonic conditions. According to the model this quantity reads

$$A_{\text{real}}/A_{\text{app}}(\sigma_0) = C\sqrt{g(\Sigma_0)A_{\text{real}}} \simeq 0.19 \times \sqrt{C^2 A_{\text{real}}}. \quad (11)$$

Since the fit does not specify the value of  $C^2 A_{\text{real}}$  (it only assumes it is significantly larger than one), it cannot answer this question quantitatively. Conversely, if we assume  $A_{\text{real}}/A_{\text{app}}(\sigma_0) = 2.5$  and use the experimental value  $A_{\text{app}}(\sigma_0) \simeq 775 \mu\text{m}^2$ , we get

$$C^{-1} = A_{\text{app}}(\sigma_0)\sqrt{g(\Sigma_0)/A_{\text{real}}} \simeq 3 \mu\text{m}, \quad (12)$$

which makes for fairly shallow ruffles, and thus validating our use of the Monge gauge and small-slope expansion of the membrane Hamiltonian.
